# Supplementary material for: MouseBytes, an open-access high-throughput pipeline and database for rodent touchscreen-based cognitive assessment
Source: eLife. 2019 Dec 11;8:e49630. doi: 10.7554/eLife.49630 (PMC6934379; doi:10.7554/eLife.49630)
Supplement: Supplementary file 1. [file elife-49630-supp1.xlsx]

## Sheet: n values_Touch screen tasks
Strain	Genotype	Touchscreen Task	Sex	Site	Age	n value
3XTG-AD	B6129SF/J	5-CSRTT	F	Site1	4	10
3XTG-AD	B6129SF/J	5-CSRTT	F	Site1	7	10
3XTG-AD	B6129SF/J	5-CSRTT	F	Site1	10	9
3XTG-AD	B6129SF/J	5-CSRTT	M	Site1	4	8
3XTG-AD	B6129SF/J	5-CSRTT	M	Site1	7	8
3XTG-AD	B6129SF/J	5-CSRTT	M	Site1	10	8
3XTG-AD	3XTG-AD	5-CSRTT	F	Site1	4	10
3XTG-AD	3XTG-AD	5-CSRTT	F	Site1	7	10
3XTG-AD	3XTG-AD	5-CSRTT	F	Site1	10	10
3XTG-AD	3XTG-AD	5-CSRTT	M	Site1	4	12
3XTG-AD	3XTG-AD	5-CSRTT	M	Site1	7	11
3XTG-AD	3XTG-AD	5-CSRTT	M	Site1	10	10
5XFAD	B6SJLF1/J	5-CSRTT	F	Site1	4	10
5XFAD	B6SJLF1/J	5-CSRTT	F	Site1	7	10
5XFAD	B6SJLF1/J	5-CSRTT	F	Site1	10	9
5XFAD	B6SJLF1/J	5-CSRTT	M	Site1	4	12
5XFAD	B6SJLF1/J	5-CSRTT	M	Site1	7	12
5XFAD	B6SJLF1/J	5-CSRTT	M	Site1	10	12
5XFAD	5XFAD	5-CSRTT	F	Site1	4	11
5XFAD	5XFAD	5-CSRTT	F	Site1	7	9
5XFAD	5XFAD	5-CSRTT	F	Site1	10	9
5XFAD	5XFAD	5-CSRTT	M	Site1	4	12
5XFAD	5XFAD	5-CSRTT	M	Site1	7	12
5XFAD	5XFAD	5-CSRTT	M	Site1	10	12
APP/PS1	C57/BL6J	5-CSRTT	F	Site1	4	13
APP/PS1	C57/BL6J	5-CSRTT	F	Site1	7	13
APP/PS1	C57/BL6J	5-CSRTT	F	Site1	10	13
APP/PS1	C57/BL6J	5-CSRTT	M	Site1	4	12
APP/PS1	C57/BL6J	5-CSRTT	M	Site1	7	12
APP/PS1	C57/BL6J	5-CSRTT	M	Site1	10	12
APP/PS1	APP/PS1	5-CSRTT	F	Site1	4	13
APP/PS1	APP/PS1	5-CSRTT	F	Site1	7	10
APP/PS1	APP/PS1	5-CSRTT	F	Site1	10	8
APP/PS1	APP/PS1	5-CSRTT	M	Site1	4	10
APP/PS1	APP/PS1	5-CSRTT	M	Site1	7	10
APP/PS1	APP/PS1	5-CSRTT	M	Site1	10	8
3XTG-AD	B6129SF/J	5-CSRTT	F	Site2	4	14
3XTG-AD	B6129SF/J	5-CSRTT	F	Site2	7	14
3XTG-AD	B6129SF/J	5-CSRTT	F	Site2	10	14
3XTG-AD	B6129SF/J	5-CSRTT	M	Site2	4	10
3XTG-AD	B6129SF/J	5-CSRTT	M	Site2	7	10
3XTG-AD	B6129SF/J	5-CSRTT	M	Site2	10	10
3XTG-AD	3XTG-AD	5-CSRTT	F	Site2	4	10
3XTG-AD	3XTG-AD	5-CSRTT	F	Site2	7	10
3XTG-AD	3XTG-AD	5-CSRTT	F	Site2	10	10
3XTG-AD	3XTG-AD	5-CSRTT	M	Site2	4	11
3XTG-AD	3XTG-AD	5-CSRTT	M	Site2	7	10
3XTG-AD	3XTG-AD	5-CSRTT	M	Site2	10	8
5XFAD	B6SJLF1/J	5-CSRTT	F	Site2	4	10
5XFAD	B6SJLF1/J	5-CSRTT	F	Site2	7	10
5XFAD	B6SJLF1/J	5-CSRTT	F	Site2	10	10
5XFAD	B6SJLF1/J	5-CSRTT	M	Site2	4	11
5XFAD	B6SJLF1/J	5-CSRTT	M	Site2	7	11
5XFAD	B6SJLF1/J	5-CSRTT	M	Site2	10	10
5XFAD	5XFAD	5-CSRTT	F	Site2	4	11
5XFAD	5XFAD	5-CSRTT	F	Site2	7	11
5XFAD	5XFAD	5-CSRTT	F	Site2	10	9
5XFAD	5XFAD	5-CSRTT	M	Site2	4	8
5XFAD	5XFAD	5-CSRTT	M	Site2	7	8
5XFAD	5XFAD	5-CSRTT	M	Site2	10	8
APP/PS1	C57/BL6J	5-CSRTT	F	Site2	4	12
APP/PS1	C57/BL6J	5-CSRTT	F	Site2	7	12
APP/PS1	C57/BL6J	5-CSRTT	F	Site2	10	12
APP/PS1	C57/BL6J	5-CSRTT	M	Site2	4	13
APP/PS1	C57/BL6J	5-CSRTT	M	Site2	7	13
APP/PS1	C57/BL6J	5-CSRTT	M	Site2	10	13
APP/PS1	APP/PS1	5-CSRTT	F	Site2	4	16
APP/PS1	APP/PS1	5-CSRTT	F	Site2	7	10
APP/PS1	APP/PS1	5-CSRTT	F	Site2	10	4
APP/PS1	APP/PS1	5-CSRTT	M	Site2	4	15
APP/PS1	APP/PS1	5-CSRTT	M	Site2	7	14
APP/PS1	APP/PS1	5-CSRTT	M	Site2	10	14
3XTG-AD	B6129SF/J	PD	F	Site 2	4	15
3XTG-AD	B6129SF/J	PD	F	Site 2	7	15
3XTG-AD	B6129SF/J	PD	F	Site 2	10	13
3XTG-AD	B6129SF/J	PD	M	Site 1	4	15
3XTG-AD	B6129SF/J	PD	M	Site 1	7	15
3XTG-AD	B6129SF/J	PD	M	Site 1	10	15
3XTG-AD	3XTG-AD	PD	F	Site 2	4	15
3XTG-AD	3XTG-AD	PD	F	Site 2	7	15
3XTG-AD	3XTG-AD	PD	F	Site 2	10	14
3XTG-AD	3XTG-AD	PD	M	Site 1	4	14
3XTG-AD	3XTG-AD	PD	M	Site 1	7	14
3XTG-AD	3XTG-AD	PD	M	Site 1	10	12
5XFAD	B6SJLF1/J	PD	F	Site 2	4	23
5XFAD	B6SJLF1/J	PD	F	Site 2	7	22
5XFAD	B6SJLF1/J	PD	F	Site 2	10	15
5XFAD	B6SJLF1/J	PD	M	Site 1	4	16
5XFAD	B6SJLF1/J	PD	M	Site 1	7	15
5XFAD	B6SJLF1/J	PD	M	Site 1	10	13
5XFAD	5XFAD	PD	F	Site 2	4	18
5XFAD	5XFAD	PD	F	Site 2	7	18
5XFAD	5XFAD	PD	F	Site 2	10	14
5XFAD	5XFAD	PD	M	Site 1	4	17
5XFAD	5XFAD	PD	M	Site 1	7	16
5XFAD	5XFAD	PD	M	Site 1	10	16
APP/PS1	C57/BL6J	PD	F	Site 2	4	15
APP/PS1	C57/BL6J	PD	F	Site 2	7	15
APP/PS1	C57/BL6J	PD	F	Site 2	10	15
APP/PS1	C57/BL6J	PD	M	Site 1	4	13
APP/PS1	C57/BL6J	PD	M	Site 1	7	15
APP/PS1	C57/BL6J	PD	M	Site 1	10	15
APP/PS1	APP/PS1	PD	F	Site 2	4	12
APP/PS1	APP/PS1	PD	F	Site 2	7	9
APP/PS1	APP/PS1	PD	F	Site 2	10	5
APP/PS1	APP/PS1	PD	M	Site 1	4	14
APP/PS1	APP/PS1	PD	M	Site 1	7	13
APP/PS1	APP/PS1	PD	M	Site 1	10	9
3XTG-AD	B6129SF/J	PAL	F	Site 2	4	11
3XTG-AD	B6129SF/J	PAL	F	Site 2	10	10
3XTG-AD	B6129SF/J	PAL	M	Stie 1	4	14
3XTG-AD	B6129SF/J	PAL	M	Stie 1	10	14
3XTG-AD	3XTG-AD	PAL	F	Site 2	4	11
3XTG-AD	3XTG-AD	PAL	F	Site 2	10	11
3XTG-AD	3XTG-AD	PAL	M	Stie 1	4	13
3XTG-AD	3XTG-AD	PAL	M	Stie 1	10	13
5XFAD	B6SJLF1/J	PAL	F	Site 2	4	16
5XFAD	B6SJLF1/J	PAL	F	Site 2	10	16
5XFAD	B6SJLF1/J	PAL	M	Stie 1	4	15
5XFAD	B6SJLF1/J	PAL	M	Stie 1	10	15
5XFAD	5XFAD	PAL	F	Site 2	4	16
5XFAD	5XFAD	PAL	F	Site 2	10	15
5XFAD	5XFAD	PAL	M	Stie 1	4	15
5XFAD	5XFAD	PAL	M	Stie 1	10	13
APP/PS1	C57/BL6J	PAL	F	Site 2	4	12
APP/PS1	C57/BL6J	PAL	F	Site 2	10	12
APP/PS1	C57/BL6J	PAL	M	Stie 1	4	14
APP/PS1	C57/BL6J	PAL	M	Stie 1	10	13
APP/PS1	APP/PS1	PAL	F	Site 2	4	15
APP/PS1	APP/PS1	PAL	F	Site 2	10	8
APP/PS1	APP/PS1	PAL	M	Stie 1	4	9
APP/PS1	APP/PS1	PAL	M	Stie 1	10	6
