# Supplementary material for: MouseBytes, an open-access high-throughput pipeline and database for rodent touchscreen-based cognitive assessment
Source: eLife. 2019 Dec 11;8:e49630. doi: 10.7554/eLife.49630 (PMC6934379; doi:10.7554/eLife.49630)
Supplement: Supplementary file 2. [file elife-49630-supp2.xlsx]

## Sheet: Tab 1 - 3xTG-AD
5-CSRTT
	Column Labels
	% Correct					% Omission					# Premature responses					# Perserverative responses					Reward Collection latency (s)					Correct touch latency (s)
Analysis	df1	df2	F	p	partial eta^2	df1	df2	F	p	partial eta^2	df1	df2	F	p	partial eta^2	df1	df2	F	p	partial eta^2	df1	df2	F	p	partial eta^2	df1	df2	F	p	partial eta^2
Age	2	134	0.57	0.548	0.01	2	134	39.26	0	0.37	2	134	0.98	0.371	0.01	2	134	2.26	0.11	0.03	2	134	3.3	0.049	0.05	2	132	9.96	0	0.13
Age*Stimulus Length	6	402	1.55	0.179	0.02	6	402	3.03	0.009	0.04	6	402	0.27	0.927	0	6	402	1.19	0.315	0.02	6	402	0.27	0.929	0	6	396	1.08	0.371	0.02
Genotype b	1	67	26.05	0	0.28	1	67	2.93	0.091	0.04	1	67	0.02	0.884	0	1	67	4.55	0.037	0.06	1	67	1	0.32	0.01	1	66	29.82	0	0.31
Genotype*Age	2	134	0.36	0.674	0.01	2	134	0.36	0.698	0.01	2	134	1.41	0.248	0.02	2	134	1.9	0.155	0.03	2	134	3.34	0.048	0.05	2	132	0.65	0.51	0.01
Genotype*Age*Stimulus Length	6	402	0.38	0.85	0.01	6	402	1.06	0.383	0.02	6	402	0.25	0.936	0	6	402	0.99	0.419	0.01	6	402	0.96	0.441	0.01	6	396	0.34	0.888	0.01
Genotype*Sex	1	67	0.25	0.621	0	1	67	0.21	0.651	0	1	67	1.13	0.291	0.02	1	67	4.7	0.034	0.07	1	67	1.28	0.262	0.02	1	66	0.8	0.374	0.01
Genotype*Sex*Age	2	134	1.22	0.295	0.02	2	134	3.44	0.035	0.05	2	134	3.09	0.053	0.04	2	134	0.37	0.687	0.01	2	134	0.88	0.4	0.01	2	132	0.07	0.918	0
Genotype*Sex*Age*Stimulus Length	6	402	0.41	0.83	0.01	6	402	0.32	0.908	0	6	402	0.22	0.953	0	6	402	1.22	0.302	0.02	6	402	1.57	0.168	0.02	6	396	0.79	0.557	0.01
Genotype*Sex*Stimulus Length	3	201	0.14	0.907	0	3	201	0.38	0.733	0.01	3	201	0.23	0.849	0	3	201	0.27	0.835	0	3	201	1.89	0.139	0.03	3	198	2.16	0.096	0.03
Genotype*Stimulus Length	3	201	7.26	0	0.1	3	201	3.05	0.038	0.04	3	201	0.33	0.773	0	3	201	2.75	0.046	0.04	3	201	1.3	0.276	0.02	3	198	0.63	0.59	0.01
Sex	1	67	0.08	0.782	0	1	67	0.04	0.846	0	1	67	0.88	0.351	0.01	1	67	1.99	0.163	0.03	1	67	0.52	0.475	0.01	1	66	7.01	0.01	0.1
Sex*Age	2	134	0.6	0.532	0.01	2	134	0.73	0.483	0.01	2	134	1.62	0.204	0.02	2	134	0.58	0.559	0.01	2	134	2.73	0.079	0.04	2	132	0.9	0.402	0.01
Sex*Age*Stimulus Length	6	402	1.11	0.355	0.02	6	402	0.98	0.432	0.01	6	402	0.84	0.517	0.01	6	402	0.8	0.546	0.01	6	402	0.36	0.874	0.01	6	396	1.12	0.349	0.02
Sex*Stimulus Length	3	201	1.05	0.364	0.02	3	201	0.23	0.842	0	3	201	0.07	0.962	0	3	201	0.14	0.933	0	3	201	0.66	0.563	0.01	3	198	0.86	0.462	0.01
Stimulus Length	3	201	248.78	0	0.79	3	201	287.06	0	0.81	3	201	11.57	0	0.15	3	201	37.23	0	0.36	3	201	5.16	0.003	0.07	3	198	88.61	0	0.57
Test Site a	1	67	0.01	0.93	0	1	67	6.11	0.016	0.08	1	67	0.03	0.873	0	1	67	12.83	0.001	0.16	1	67	26.09	0	0.28	1	66	16.39	0	0.2
Test Site*Age a	2	134	5.24	0.008	0.07	2	134	3.4	0.037	0.05	2	134	0.73	0.473	0.01	2	134	7.97	0.001	0.11	2	134	28.13	0	0.3	2	132	11.64	0	0.15
Test Site*Age*Stimulus Length a	6	402	0.83	0.521	0.01	6	402	0.71	0.625	0.01	6	402	0.82	0.537	0.01	6	402	1.47	0.202	0.02	6	402	0.36	0.874	0.01	6	396	1.01	0.408	0.02
Test Site*Genotype a	1	67	4.64	0.035	0.06	1	67	1.09	0.3	0.02	1	67	3.15	0.08	0.04	1	67	3.02	0.087	0.04	1	67	1.29	0.26	0.02	1	66	8.35	0.005	0.11
Test Site*Genotype*Age a	2	134	1.02	0.358	0.01	2	134	1.22	0.297	0.02	2	134	0.8	0.443	0.01	2	134	1.64	0.198	0.02	2	134	1.37	0.257	0.02	2	132	1.95	0.15	0.03
Test Site*Genotype*Age*Stimulus Length a	6	402	1.2	0.31	0.02	6	402	1.08	0.373	0.02	6	402	1.85	0.105	0.03	6	402	0.87	0.497	0.01	6	402	0.91	0.477	0.01	6	396	0.26	0.931	0
Test Site*Genotype*Sex a	1	67	0.3	0.584	0	1	67	0.12	0.732	0	1	67	0.04	0.836	0	1	67	0.82	0.369	0.01	1	67	3.85	0.054	0.05	1	66	0.25	0.621	0
Test Site*Genotype*Sex*Age a	2	134	0.68	0.495	0.01	2	134	0.43	0.651	0.01	2	134	1.97	0.147	0.03	2	134	0.22	0.802	0	2	134	1.51	0.227	0.02	2	132	0.77	0.456	0.01
Test Site*Genotype*Sex*Age*Stimulus Length a	6	402	0.96	0.435	0.01	6	402	0.27	0.936	0	6	402	2.02	0.076	0.03	6	402	1.01	0.413	0.01	6	402	0.74	0.591	0.01	6	396	1.1	0.362	0.02
Test Site*Genotype*Sex*Stimulus Length a	3	201	0.04	0.979	0	3	201	0.15	0.906	0	3	201	1.34	0.263	0.02	3	201	0.37	0.764	0.01	3	201	2.44	0.072	0.04	3	198	1.48	0.221	0.02
Test Site*Genotype*Stimulus Length a	3	201	1.18	0.314	0.02	3	201	0.44	0.694	0.01	3	201	0.71	0.527	0.01	3	201	0.46	0.703	0.01	3	201	0.49	0.672	0.01	3	198	0.66	0.571	0.01
Test Site*Sex a	1	67	0.03	0.871	0	1	67	0.11	0.743	0	1	67	0.76	0.387	0.01	1	67	1	0.322	0.01	1	67	20.96	0	0.24	1	66	1.9	0.173	0.03
Test Site*Sex*Age a	2	134	0.77	0.454	0.01	2	134	2.3	0.104	0.03	2	134	1.33	0.266	0.02	2	134	1.65	0.196	0.02	2	134	15.03	0	0.18	2	132	6.76	0.002	0.09
Test Site*Sex*Age*Stimulus Length a	6	402	1.39	0.231	0.02	6	402	0.63	0.685	0.01	6	402	0.38	0.86	0.01	6	402	1.13	0.343	0.02	6	402	1.9	0.094	0.03	6	396	0.59	0.703	0.01
Test Site*Sex*Stimulus Length a	3	201	0.17	0.885	0	3	201	0.37	0.741	0.01	3	201	0.68	0.546	0.01	3	201	0.95	0.415	0.01	3	201	0.66	0.563	0.01	3	198	1.49	0.218	0.02
Test Site*Stimulus Length a	3	201	0.54	0.624	0.01	3	201	0.51	0.648	0.01	3	201	0.72	0.523	0.01	3	201	1.46	0.229	0.02	3	201	2.13	0.104	0.03	3	198	4.1	0.008	0.06
* note = " 0" value means p value is less than 0.001
p ≥ 0.05
p ≤ 0.05

## Sheet: Tab 2 - 5xFAD
5-CSRTT
	Column Labels
	% Correct					% Omission					# Premature responses					# Perserverative responses					Reward Collection latency (s)					Correct touch latency (s)
Analysis	df1	df2	F	p	partial eta^2	df1	df2	F	p	partial eta^2	df1	df2	F	p	partial eta^2	df1	df2	F	p	partial eta^2	df1	df2	F	p	partial eta^2	df1	df2	F	p	partial eta^2
Age	2	136	0.55	0.541	0.01	2	136	20.01	0	0.23	2	136	0.75	0.466	0.01	2	136	15.28	0	0.18	2	136	21.13	0	0.24	2	136	1.5	0.227	0.02
Age*Stimulus Length	6	408	0.72	0.617	0.01	6	408	1.19	0.315	0.02	6	408	1.2	0.31	0.02	6	408	0.5	0.763	0.01	6	408	1.12	0.351	0.02	6	408	0.37	0.882	0.01
Genotype e i	1	68	12.69	0.001	0.16	1	68	3.3	0.074	0.05	1	68	0.6	0.44	0.01	1	68	14.26	0	0.17	1	68	46.25	0	0.4	1	68	14.51	0	0.18
Genotype*Age e	2	136	4.92	0.014	0.07	2	136	2.82	0.065	0.04	2	136	0.68	0.497	0.01	2	136	7.88	0.002	0.1	2	136	30.33	0	0.31	2	136	1.85	0.165	0.03
Genotype*Age*Stimulus Length	6	408	1.1	0.361	0.02	6	408	1.4	0.219	0.02	6	408	0.46	0.809	0.01	6	408	0.27	0.921	0	6	408	0.7	0.638	0.01	6	408	0.77	0.583	0.01
Genotype*Sex	1	68	0.67	0.415	0.01	1	68	0.02	0.897	0	1	68	1.43	0.236	0.02	1	68	0.15	0.699	0	1	68	0.17	0.681	0	1	68	5.27	0.025	0.07
Genotype*Sex*Age	2	136	1.54	0.222	0.02	2	136	0.98	0.376	0.01	2	136	2.74	0.072	0.04	2	136	0.03	0.941	0	2	136	1.09	0.333	0.02	2	136	1.07	0.34	0.02
Genotype*Sex*Age*Stimulus Length	6	408	1.11	0.355	0.02	6	408	0.54	0.752	0.01	6	408	0.84	0.524	0.01	6	408	0.42	0.826	0.01	6	408	0.48	0.809	0.01	6	408	1.08	0.371	0.02
Genotype*Sex*Stimulus Length	3	204	3.07	0.036	0.04	3	204	3.16	0.034	0.04	3	204	1.7	0.177	0.02	3	204	0.89	0.439	0.01	3	204	2.11	0.102	0.03	3	204	0.62	0.585	0.01
Genotype*Stimulus Length	3	204	1.45	0.234	0.02	3	204	2.31	0.089	0.03	3	204	0.16	0.897	0	3	204	0.94	0.413	0.01	3	204	0.97	0.406	0.01	3	204	0.41	0.721	0.01
Sex	1	68	2.96	0.09	0.04	1	68	0.79	0.377	0.01	1	68	15.32	0	0.18	1	68	2.29	0.135	0.03	1	68	1.65	0.204	0.02	1	68	0.05	0.826	0
Sex*Age	2	136	0.46	0.588	0.01	2	136	1.55	0.216	0.02	2	136	0.13	0.866	0	2	136	4.44	0.022	0.06	2	136	0.53	0.572	0.01	2	136	1.98	0.146	0.03
Sex*Age*Stimulus Length	6	408	0.51	0.781	0.01	6	408	0.4	0.857	0.01	6	408	0.58	0.713	0.01	6	408	1.51	0.189	0.02	6	408	1.15	0.335	0.02	6	408	0.95	0.45	0.01
Sex*Stimulus Length	3	204	1.56	0.205	0.02	3	204	0.16	0.894	0	3	204	0.44	0.691	0.01	3	204	0.76	0.506	0.01	3	204	0.71	0.544	0.01	3	204	0.31	0.797	0
Stimulus Length	3	204	298.2	0	0.81	3	204	263.63	0	0.79	3	204	14.99	0	0.18	3	204	29.83	0	0.3	3	204	1.76	0.157	0.03	3	204	191.29	0	0.74
Test Site a	1	68	5.8	0.019	0.08	1	68	0.36	0.549	0.01	1	68	0.45	0.504	0.01	1	68	7.37	0.008	0.1	1	68	4.92	0.03	0.07	1	68	3.89	0.053	0.05
Test Site*Age a	2	136	5.3	0.011	0.07	2	136	7.42	0.001	0.1	2	136	1.87	0.161	0.03	2	136	0.3	0.686	0	2	136	14.46	0	0.18	2	136	0.92	0.394	0.01
Test Site*Age*Stimulus Length a	6	408	0.2	0.967	0	6	408	0.46	0.813	0.01	6	408	1.32	0.254	0.02	6	408	0.66	0.644	0.01	6	408	1.14	0.34	0.02	6	408	0.51	0.786	0.01
Test Site*Genotype a	1	68	0.47	0.493	0.01	1	68	0.21	0.649	0	1	68	0.18	0.67	0	1	68	1.15	0.288	0.02	1	68	0.68	0.411	0.01	1	68	2.42	0.125	0.03
Test Site*Genotype*Age a	2	136	0.41	0.619	0.01	2	136	1.37	0.259	0.02	2	136	0.17	0.831	0	2	136	1.22	0.293	0.02	2	136	1.37	0.258	0.02	2	136	0.11	0.877	0
Test Site*Genotype*Age*Stimulus Length a	6	408	1.35	0.24	0.02	6	408	0.19	0.971	0	6	408	0.98	0.432	0.01	6	408	0.93	0.455	0.01	6	408	0.33	0.911	0	6	408	0.91	0.479	0.01
Test Site*Genotype*Sex a	1	68	0.55	0.461	0.01	1	68	1.06	0.307	0.02	1	68	0.21	0.645	0	1	68	0.18	0.676	0	1	68	2	0.162	0.03	1	68	1.48	0.228	0.02
Test Site*Genotype*Sex*Age a	2	136	0.5	0.564	0.01	2	136	3.03	0.053	0.04	2	136	0.89	0.406	0.01	2	136	2.49	0.101	0.04	2	136	0.18	0.813	0	2	136	0.96	0.38	0.01
Test Site*Genotype*Sex*Age*Stimulus Length a	6	408	0.94	0.459	0.01	6	408	0.6	0.71	0.01	6	408	0.86	0.51	0.01	6	408	1.05	0.389	0.02	6	408	0.84	0.53	0.01	6	408	0.83	0.536	0.01
Test Site*Genotype*Sex*Stimulus Length a	3	204	0.25	0.835	0	3	204	0.91	0.425	0.01	3	204	1.68	0.18	0.02	3	204	2.04	0.116	0.03	3	204	1.92	0.129	0.03	3	204	1.1	0.347	0.02
Test Site*Genotype*Stimulus Length a	3	204	1.08	0.352	0.02	3	204	0.73	0.512	0.01	3	204	1.9	0.142	0.03	3	204	1.94	0.131	0.03	3	204	0.66	0.572	0.01	3	204	2.1	0.109	0.03
Test Site*Sex a	1	68	0.01	0.933	0	1	68	0.45	0.502	0.01	1	68	0.08	0.777	0	1	68	0.26	0.612	0	1	68	5.45	0.023	0.07	1	68	0.03	0.874	0
Test Site*Sex*Age a	2	136	0.02	0.955	0	2	136	0.22	0.795	0	2	136	1.55	0.217	0.02	2	136	0.49	0.569	0.01	2	136	2.73	0.076	0.04	2	136	0.38	0.669	0.01
Test Site*Sex*Age*Stimulus Length a	6	408	0.57	0.738	0.01	6	408	0.63	0.685	0.01	6	408	0.61	0.69	0.01	6	408	1.5	0.193	0.02	6	408	4.03	0.001	0.06	6	408	0.7	0.632	0.01
Test Site*Sex*Stimulus Length a	3	204	0.45	0.687	0.01	3	204	0.27	0.813	0	3	204	1.83	0.154	0.03	3	204	0.37	0.758	0.01	3	204	0.38	0.761	0.01	3	204	0.7	0.537	0.01
Test Site*Stimulus Length a	3	204	1.64	0.187	0.02	3	204	0.17	0.886	0	3	204	0.22	0.849	0	3	204	0.28	0.822	0	3	204	0.53	0.658	0.01	3	204	0.86	0.454	0.01
* note = " 0" value means p value is less than 0.001
p ≥ 0.05
p ≤ 0.05

## Sheet: Tab 3 - APP PS1
5-CSRTT
	Column Labels
	% Correct					% Omission					# Premature responses					# Perserverative responses					Reward Collection latency (s)					Correct touch latency (s)
Analysis	df1	df2	F	p	partial eta^2	df1	df2	F	p	partial eta^2	df1	df2	F	p	partial eta^2	df1	df2	F	p	partial eta^2	df1	df2	F	p	partial eta^2	df1	df2	F	p	partial eta^2
Age	2	152	9.23	0	0.11	2	152	10.69	0	0.12	2	152	9.63	0	0.11	2	152	2.29	0.106	0.03	2	152	1.07	0.344	0.01	2	152	4.87	0.009	0.06
Age*Stimulus Length	6	456	1.73	0.124	0.02	6	456	0.35	0.892	0	6	456	0.34	0.902	0	6	456	1.15	0.335	0.01	6	456	1.05	0.389	0.01	6	456	1.21	0.306	0.02
Genotype	1	76	1.89	0.174	0.02	1	76	5.59	0.021	0.07	1	76	1.23	0.272	0.02	1	76	2.66	0.107	0.03	1	76	0.1	0.755	0	1	76	1.59	0.211	0.02
Genotype*Age	2	152	1.26	0.287	0.02	2	152	0.65	0.524	0.01	2	152	1.63	0.202	0.02	2	152	2.65	0.075	0.03	2	152	1.78	0.172	0.02	2	152	2.2	0.116	0.03
Genotype*Age*Stimulus Length	6	456	0.96	0.445	0.01	6	456	0.77	0.579	0.01	6	456	0.58	0.727	0.01	6	456	1.07	0.376	0.01	6	456	1.7	0.136	0.02	6	456	0.78	0.568	0.01
Genotype*Sex	1	76	0.54	0.463	0.01	1	76	2.02	0.16	0.03	1	76	0.15	0.696	0	1	76	2.19	0.143	0.03	1	76	9.78	0.002	0.11	1	76	2.9	0.092	0.04
Genotype*Sex*Age	2	152	2.59	0.08	0.03	2	152	1.81	0.167	0.02	2	152	2.67	0.077	0.03	2	152	0.64	0.526	0.01	2	152	1.44	0.24	0.02	2	152	0.76	0.468	0.01
Genotype*Sex*Age*Stimulus Length	6	456	0.76	0.58	0.01	6	456	0.63	0.687	0.01	6	456	2.04	0.067	0.03	6	456	0.31	0.916	0	6	456	0.65	0.657	0.01	6	456	0.26	0.939	0
Genotype*Sex*Stimulus Length	3	228	1.24	0.295	0.02	3	228	1.82	0.146	0.02	3	228	2.3	0.082	0.03	3	228	0.02	0.997	0	3	228	0.13	0.93	0	3	228	1.46	0.23	0.02
Genotype*Stimulus Length	3	228	0.89	0.438	0.01	3	228	1.02	0.381	0.01	3	228	0.65	0.574	0.01	3	228	0.47	0.699	0.01	3	228	0.52	0.65	0.01	3	228	0.31	0.785	0
Sex	1	76	0.38	0.54	0	1	76	0.11	0.743	0	1	76	16.7	0	0.18	1	76	1.77	0.188	0.02	1	76	6.98	0.01	0.08	1	76	0.72	0.398	0.01
Sex*Age	2	152	0.05	0.944	0	2	152	1.77	0.174	0.02	2	152	1.08	0.337	0.01	2	152	0.13	0.874	0	2	152	2.76	0.067	0.04	2	152	0.3	0.734	0
Sex*Age*Stimulus Length	6	456	0.62	0.689	0.01	6	456	0.29	0.926	0	6	456	1.92	0.085	0.02	6	456	0.41	0.857	0.01	6	456	0.7	0.619	0.01	6	456	0.65	0.669	0.01
Sex*Stimulus Length	3	228	0.31	0.804	0	3	228	0.56	0.635	0.01	3	228	0.5	0.675	0.01	3	228	0.85	0.464	0.01	3	228	1.3	0.276	0.02	3	228	2.01	0.124	0.03
Stimulus Length	3	228	215.09	0	0.74	3	228	300.9	0	0.8	3	228	8.23	0	0.1	3	228	15.94	0	0.17	3	228	1.58	0.198	0.02	3	228	161.78	0	0.68
Test Site a	1	76	11.12	0.001	0.13	1	76	0.02	0.883	0	1	76	0.73	0.396	0.01	1	76	0.78	0.381	0.01	1	76	8.5	0.005	0.1	1	76	1.16	0.286	0.01
Test Site*Age a	2	152	0.42	0.65	0.01	2	152	3.17	0.046	0.04	2	152	1.05	0.348	0.01	2	152	1.03	0.358	0.01	2	152	6.3	0.002	0.08	2	152	1.92	0.152	0.02
Test Site*Age*Stimulus Length a	6	456	0.49	0.787	0.01	6	456	0.96	0.445	0.01	6	456	1.29	0.265	0.02	6	456	0.43	0.839	0.01	6	456	0.38	0.857	0.01	6	456	0.23	0.953	0
Test Site*Genotype a	1	76	0.8	0.374	0.01	1	76	1.55	0.216	0.02	1	76	0.09	0.761	0	1	76	1.02	0.315	0.01	1	76	0.32	0.574	0	1	76	0.05	0.832	0
Test Site*Genotype*Age a	2	152	0.29	0.742	0	2	152	1.55	0.217	0.02	2	152	0.26	0.755	0	2	152	1.76	0.176	0.02	2	152	1.36	0.259	0.02	2	152	0.04	0.961	0
Test Site*Genotype*Age*Stimulus Length a	6	456	0.8	0.556	0.01	6	456	1.17	0.323	0.02	6	456	0.64	0.682	0.01	6	456	0.51	0.779	0.01	6	456	0.74	0.588	0.01	6	456	1.06	0.385	0.01
Test Site*Genotype*Sex a	1	76	1.76	0.188	0.02	1	76	1.23	0.27	0.02	1	76	1.79	0.185	0.02	1	76	3.5	0.065	0.04	1	76	0.04	0.84	0	1	76	0	0.986	0
Test Site*Genotype*Sex*Age a	2	152	2.01	0.139	0.03	2	152	1.47	0.233	0.02	2	152	0.29	0.731	0	2	152	0.36	0.695	0	2	152	2.17	0.118	0.03	2	152	2.72	0.07	0.03
Test Site*Genotype*Sex*Age*Stimulus Length a	6	456	2.48	0.03	0.03	6	456	0.65	0.672	0.01	6	456	0.36	0.887	0	6	456	0.54	0.759	0.01	6	456	0.52	0.754	0.01	6	456	0.53	0.754	0.01
Test Site*Genotype*Sex*Stimulus Length a	3	228	0.47	0.685	0.01	3	228	0.15	0.922	0	3	228	0.17	0.906	0	3	228	0.3	0.818	0	3	228	0.22	0.867	0	3	228	0.32	0.78	0
Test Site*Genotype*Stimulus Length a	3	228	1.1	0.346	0.01	3	228	0.06	0.979	0	3	228	0.75	0.517	0.01	3	228	0.39	0.753	0.01	3	228	0.43	0.711	0.01	3	228	1	0.386	0.01
Test Site*Sex a	1	76	0.01	0.909	0	1	76	0.15	0.7	0	1	76	1.56	0.215	0.02	1	76	1.12	0.294	0.01	1	76	0.93	0.339	0.01	1	76	0.04	0.85	0
Test Site*Sex*Age a	2	152	3.52	0.034	0.04	2	152	4.58	0.012	0.06	2	152	1.81	0.17	0.02	2	152	0.19	0.826	0	2	152	1.02	0.362	0.01	2	152	1.86	0.16	0.02
Test Site*Sex*Age*Stimulus Length a	6	456	1.03	0.401	0.01	6	456	0.6	0.714	0.01	6	456	0.56	0.746	0.01	6	456	2.24	0.045	0.03	6	456	0.87	0.499	0.01	6	456	0.21	0.96	0
Test Site*Sex*Stimulus Length a	3	228	0.41	0.729	0.01	3	228	0.34	0.787	0	3	228	0.21	0.879	0	3	228	0.33	0.792	0	3	228	1.47	0.228	0.02	3	228	0.6	0.59	0.01
Test Site*Stimulus Length a	3	228	0.27	0.828	0	3	228	1.62	0.188	0.02	3	228	0.73	0.529	0.01	3	228	2.69	0.05	0.03	3	228	1.8	0.154	0.02	3	228	0.64	0.567	0.01
* note = " 0" value means p value is less than 0.001
p ≥ 0.05
p ≤ 0.05
