# Supplementary material for: MouseBytes, an open-access high-throughput pipeline and database for rodent touchscreen-based cognitive assessment
Source: eLife. 2019 Dec 11;8:e49630. doi: 10.7554/eLife.49630 (PMC6934379; doi:10.7554/eLife.49630)
Supplement: Supplementary file 3. [file elife-49630-supp3.xlsx]

## Sheet: Tab 1 - 3xTG-AD
PAL
	Column Labels
	% Correct					# Correction Trials					Reward Collection Latency (s)					Correct Touch Latency (s)
Analysis	df1	df2	F	p	partial eta^2	df1	df2	F	p	partial eta^2	df1	df2	F	p	partial eta^2	df1	df2	F	p	partial eta^2
4 Months
Genotype	1	45	3.52	0.067	0.07	1	45	0.8	0.376	0.02	1	45	0.02	0.902	0	1	45	1.56	0.218	0.03
Sex	1	45	3.62	0.064	0.07	1	45	3.99	0.052	0.08	1	45	11.68	0.001	0.21	1	45	0.8	0.376	0.02
Week	8	360	182.75	0	0.8	8	360	137.45	0	0.75	8	360	33.79	0	0.43	8	360	37.06	0	0.45
Genotype*Sex d	1	45	4.75	0.035	0.1	1	45	0.53	0.469	0.01	1	45	12.88	0.001	0.22	1	45	0.99	0.326	0.02
Genotype*Week	8	360	0.99	0.415	0.02	8	360	0.66	0.597	0.01	8	360	0.58	0.646	0.01	8	360	0.68	0.546	0.01
Sex*Week	8	360	2.81	0.027	0.06	8	360	2.86	0.032	0.06	8	360	0.8	0.507	0.02	8	360	0.64	0.573	0.01
Genotype*Sex*Week	8	360	0.63	0.644	0.01	8	360	1.59	0.187	0.03	8	360	0.54	0.673	0.01	8	360	0.25	0.836	0.01
10 Months
Genotype	1	44	0.73	0.397	0.02	1	44	0.12	0.726	0	1	44	0.31	0.579	0.01	1	44	0.18	0.671	0
Sex	1	44	0.12	0.735	0	1	44	0.15	0.699	0	1	44	14.33	0	0.25	1	44	0.42	0.519	0.01
Week	8	352	49.28	0	0.53	8	352	98.38	0	0.69	8	352	4.7	0.001	0.1	8	352	20.6	0	0.32
Genotype*Sex	1	44	0.08	0.778	0	1	44	0.01	0.944	0	1	44	10.38	0.002	0.19	1	44	0.22	0.64	0.01
Genotype*Week	8	352	0.48	0.765	0.01	8	352	1.77	0.128	0.04	8	352	0.74	0.585	0.02	8	352	0.9	0.475	0.02
Sex*Week	8	352	1.66	0.154	0.04	8	352	3.24	0.01	0.07	8	352	9.15	0	0.17	8	352	4.86	0.001	0.1
Genotype*Sex*Week	8	352	0.32	0.877	0.01	8	352	1.59	0.171	0.03	8	352	1.64	0.155	0.04	8	352	0.63	0.658	0.01
* note = " 0" value means p value is less than 0.001
p ≥ 0.05
p ≤ 0.05

## Sheet: Tab 2 - 5xFAD
PAL
	Column Labels
	% Correct					# Correction Trials					Reward Collection Latency (s)					Correct Touch Latency (s)
Analysis	df1	df2	F	p	partial eta^2	df1	df2	F	p	partial eta^2	df1	df2	F	p	partial eta^2	df1	df2	F	p	partial eta^2
4 Months
Genotype i	1	58	2.42	0.125	0.04	1	58	5.19	0.026	0.08	1	57	37.87	0	0.4	1	57	3.47	0.068	0.06
Sex	1	58	11.86	0.001	0.17	1	58	7.09	0.01	0.11	1	57	64.59	0	0.53	1	57	0.01	0.909	0
Week	8	464	82.07	0	0.59	8	464	108.07	0	0.65	8	456	7.64	0	0.12	8	456	32.82	0	0.37
Genotype*Sex	1	58	0	0.956	0	1	58	0.01	0.918	0	1	57	7.67	0.008	0.12	1	57	2.32	0.133	0.04
Genotype*Week	8	464	1.72	0.148	0.03	8	464	2.02	0.099	0.03	8	456	0.45	0.729	0.01	8	456	1.55	0.199	0.03
Sex*Week	8	464	4.8	0.001	0.08	8	464	6.75	0	0.1	8	456	5.6	0.001	0.09	8	456	1.76	0.152	0.03
Genotype*Sex*Week	8	464	0.65	0.622	0.01	8	464	0.94	0.439	0.02	8	456	1.46	0.225	0.03	8	456	0.08	0.976	0
10 Months
Genotype f i	1	55	24.88	0	0.31	1	55	40.44	0	0.42	1	55	108.75	0	0.66	1	55	0.31	0.578	0.01
Sex	1	55	6.68	0.012	0.11	1	55	0.4	0.528	0.01	1	55	40.62	0	0.42	1	55	3.17	0.08	0.05
Week	8	440	81.31	0	0.6	8	440	66.64	0	0.55	8	440	6.6	0	0.11	8	440	3.22	0.012	0.06
Genotype*Sex	1	55	2.86	0.097	0.05	1	55	6.54	0.013	0.11	1	55	13.64	0.001	0.2	1	55	5.33	0.025	0.09
Genotype*Week f	8	440	11.38	0	0.17	8	440	2.67	0.021	0.05	8	440	1.01	0.398	0.02	8	440	1.97	0.098	0.03
Sex*Week	8	440	6.96	0	0.11	8	440	10.38	0	0.16	8	440	6.57	0	0.11	8	440	1.77	0.133	0.03
Genotype*Sex*Week	8	440	2.75	0.026	0.05	8	440	3.96	0.002	0.07	8	440	6.88	0	0.11	8	440	0.84	0.505	0.02
* note = " 0" value means p value is less than 0.001
p ≥ 0.05
p ≤ 0.05

## Sheet: Tab 3 - APP PS1
PAL
	Column Labels
	% Correct					# Correction Trials					Reward Collection Latency (s)					Correct Touch Latency (s)
Analysis	df1	df2	F	p	partial eta^2	df1	df2	F	p	partial eta^2	df1	df2	F	p	partial eta^2	df1	df2	F	p	partial eta^2
4 Months
Genotype	1	44	0.43	0.513	0.01	1	44	4.11	0.049	0.09	1	44	0.03	0.865	0	1	44	30.6	0	0.41
Sex	1	44	0.42	0.521	0.01	1	44	7.55	0.009	0.15	1	44	13.3	0.001	0.23	1	44	42.9	0	0.49
Week	8	352	125.9	0	0.74	8	352	174.6	0	0.8	8	352	12.91	0	0.23	8	352	26.02	0	0.37
Genotype*Sex g	1	44	14.86	0	0.25	1	44	7.42	0.009	0.14	1	44	0.36	0.554	0.01	1	44	8.75	0.005	0.17
Genotype*Week	8	352	1.87	0.113	0.04	8	352	1.8	0.134	0.04	8	352	1.44	0.223	0.03	8	352	2.7	0.033	0.06
Sex*Week	8	352	0.48	0.76	0.01	8	352	3.79	0.006	0.08	8	352	3.33	0.012	0.07	8	352	2.03	0.093	0.04
Genotype*Sex*Week g	8	352	2.6	0.035	0.06	8	352	5.45	0	0.11	8	352	4.36	0.002	0.09	8	352	3.88	0.005	0.08
10 Months
Genotype	1	28	1.87	0.182	0.06	1	28	1.88	0.181	0.06	1	28	0.54	0.468	0.02	1	28	0.01	0.943	0
Sex	1	28	0.14	0.714	0	1	28	0	0.989	0	1	28	14.6	0.001	0.34	1	28	47.21	0	0.63
Week	8	224	82.6	0	0.75	8	224	91.83	0	0.77	8	224	7.55	0	0.21	8	224	18.26	0	0.39
Genotype*Sex	1	28	1.02	0.321	0.04	1	28	1.78	0.192	0.06	1	28	3.84	0.06	0.12	1	28	0.45	0.509	0.02
Genotype*Week	8	224	1	0.421	0.03	8	224	0.82	0.507	0.03	8	224	1.53	0.195	0.05	8	224	0.72	0.553	0.03
Sex*Week	8	224	1.26	0.286	0.04	8	224	0.63	0.623	0.02	8	224	6.88	0	0.2	8	224	4.88	0.002	0.15
Genotype*Sex*Week	8	224	0.84	0.52	0.03	8	224	0.85	0.489	0.03	8	224	2.48	0.046	0.08	8	224	1.33	0.268	0.05
* note = " 0" value means p value is less than 0.001
p ≥ 0.05
p ≤ 0.05
