# Supplementary material for: MouseBytes, an open-access high-throughput pipeline and database for rodent touchscreen-based cognitive assessment
Source: eLife. 2019 Dec 11;8:e49630. doi: 10.7554/eLife.49630 (PMC6934379; doi:10.7554/eLife.49630)
Supplement: Supplementary file 4. [file elife-49630-supp4.xlsx]

## Sheet: Tab 1 - 3xTG-AD
PD
	Column Labels
	% Correct					Number of correction trials					Reward collection latency (s)					Correct touch latency (s)
Analysis	df1	df2	F	p	partial eta^2	df1	df2	F	p	partial eta^2	df1	df2	F	p	partial eta^2	df1	df2	F	p	partial eta^2
4 Months
Genotype	1	53	0.65	0.424	0.01	1	53	0.16	0.691	0	1	48	0.65	0.424	0.01	1	49	8.17	0.006	0.14
Sex	1	53	0.11	0.743	0	1	53	1.03	0.314	0.02	1	48	9.58	0.003	0.17	1	49	0.08	0.783	0
Day	9	477	151.28	0	0.74	9	477	175.87	0	0.77	9	432	4.59	0	0.09	9	441	38.74	0	0.44
Genotype*Sex	1	53	5.96	0.018	0.1	1	53	1.89	0.175	0.03	1	48	0.39	0.538	0.01	1	49	0.65	0.423	0.01
Genotype*Day	9	477	0.71	0.607	0.01	9	477	1.24	0.295	0.02	9	432	1.15	0.337	0.02	9	441	0.86	0.509	0.02
Sex*Day	9	477	1.41	0.226	0.03	9	477	1.02	0.398	0.02	9	432	1.06	0.383	0.02	9	441	2.18	0.056	0.04
Genotype*Sex*Day	9	477	1.12	0.349	0.02	9	477	0.86	0.494	0.02	9	432	1.27	0.278	0.03	9	441	1.11	0.354	0.02
7 Months
Genotype	1	55	0.08	0.778	0	1	55	0.07	0.796	0	1	55	0.03	0.853	0	1	55	0	0.963	0
Sex	1	55	0.31	0.583	0.01	1	55	0.17	0.678	0	1	55	13.88	0	0.2	1	55	2.18	0.145	0.04
Day	9	495	236.67	0	0.81	9	495	234.56	0	0.81	9	495	3.69	0.002	0.06	9	495	44.81	0	0.45
Genotype*Sex	1	55	0.03	0.875	0	1	55	0	0.978	0	1	55	0.34	0.564	0.01	1	55	2.93	0.092	0.05
Genotype*Day	9	495	1.04	0.392	0.02	9	495	0.61	0.649	0.01	9	495	3.34	0.004	0.06	9	495	1.45	0.229	0.03
Sex*Day	9	495	1.8	0.118	0.03	9	495	1.28	0.28	0.02	9	495	2.18	0.046	0.04	9	495	2.99	0.031	0.05
Genotype*Sex*Day	9	495	1.37	0.241	0.02	9	495	1.31	0.267	0.02	9	495	0.93	0.475	0.02	9	495	0.71	0.554	0.01
10 Months
Genotype	1	50	0	0.985	0	1	50	0.07	0.796	0	1	50	0.69	0.409	0.01	1	50	2.94	0.093	0.06
Sex	1	50	3.84	0.056	0.07	1	50	1.85	0.18	0.04	1	50	3.61	0.063	0.07	1	50	0.23	0.634	0
Day	9	450	111.8	0	0.69	9	450	207.28	0	0.81	9	450	2.42	0.029	0.05	9	450	28.89	0	0.37
Genotype*Sex	1	50	0.27	0.608	0.01	1	50	0.27	0.605	0.01	1	50	0.06	0.802	0	1	50	5.5	0.023	0.1
Genotype*Day	9	450	1.71	0.134	0.03	9	450	1.31	0.265	0.03	9	450	0.49	0.805	0.01	9	450	0.95	0.424	0.02
Sex*Day	9	450	0.35	0.876	0.01	9	450	0.61	0.673	0.01	9	450	0.33	0.913	0.01	9	450	0.46	0.721	0.01
Genotype*Sex*Day	9	450	0.87	0.497	0.02	9	450	1.04	0.392	0.02	9	450	0.83	0.541	0.02	9	450	3.77	0.01	0.07
* note = " 0" value means p value is less than 0.001
p ≥ 0.05
p ≤ 0.05

## Sheet: Tab 2 - 5xFAD
PD
	Column Labels
	% Correct					Number of correction trials					Reward collection latency (s)					Correct touch latency (s)
Analysis	df1	df2	F	p	partial eta^2	df1	df2	F	p	partial eta^2	df1	df2	F	p	partial eta^2	df1	df2	F	p	partial eta^2
4 Months
Genotype i	1	57	0.26	0.609	0	1	57	0.47	0.497	0.01	1	56	17.74	0	0.24	1	55	10.98	0.002	0.17
Sex	1	57	0.65	0.424	0.01	1	57	1.4	0.241	0.02	1	56	6	0.017	0.1	1	55	0.3	0.587	0.01
Day	9	513	81.94	0	0.59	9	513	124.13	0	0.69	9	504	8.9	0	0.14	9	495	26.48	0	0.32
Genotype*Sex	1	57	0.06	0.805	0	1	57	3.38	0.071	0.06	1	56	0.66	0.421	0.01	1	55	0.1	0.752	0
Genotype*Day	9	513	0.97	0.437	0.02	9	513	0.72	0.589	0.01	9	504	0.46	0.821	0.01	9	495	1.65	0.163	0.03
Sex*Day	9	513	0.98	0.433	0.02	9	513	1.52	0.192	0.03	9	504	1.3	0.261	0.02	9	495	1.02	0.399	0.02
Genotype*Sex*Day	9	513	1.09	0.367	0.02	9	513	2.35	0.051	0.04	9	504	0.62	0.692	0.01	9	495	0.66	0.622	0.01
7 Months
Genotype i	1	58	0.58	0.449	0.01	1	58	3.74	0.058	0.06	1	58	54.94	0	0.49	1	58	9.35	0.003	0.14
Sex	1	58	5.1	0.028	0.08	1	58	7.8	0.007	0.12	1	58	1.72	0.194	0.03	1	58	0.01	0.916	0
Day	9	522	179.3	0	0.76	9	522	223.49	0	0.79	9	522	6.11	0	0.1	9	522	66.75	0	0.54
Genotype*Sex	1	58	2.66	0.108	0.04	1	58	2.6	0.112	0.04	1	58	5.13	0.027	0.08	1	58	0.54	0.467	0.01
Genotype*Day	9	522	1.48	0.188	0.02	9	522	1.53	0.192	0.03	9	522	0.93	0.473	0.02	9	522	0.99	0.417	0.02
Sex*Day	9	522	2.12	0.056	0.04	9	522	2.14	0.074	0.04	9	522	1.7	0.124	0.03	9	522	2.66	0.031	0.04
Genotype*Sex*Day	9	522	2.19	0.049	0.04	9	522	0.72	0.584	0.01	9	522	2.32	0.035	0.04	9	522	1.3	0.27	0.02
10 Months
Genotype i	1	51	3.14	0.082	0.06	1	51	0	0.954	0	1	51	79.79	0	0.61	1	51	25.45	0	0.33
Sex	1	51	0.73	0.396	0.01	1	51	0.11	0.741	0	1	51	5.1	0.028	0.09	1	51	1.58	0.214	0.03
Day	9	459	63.92	0	0.56	9	459	127.73	0	0.71	9	459	0.84	0.529	0.02	9	459	17.39	0	0.25
Genotype*Sex	1	51	0	0.976	0	1	51	0	0.975	0	1	51	8.75	0.005	0.15	1	51	0.13	0.718	0
Genotype*Day	9	459	1.44	0.209	0.03	9	459	0.4	0.835	0.01	9	459	0.72	0.626	0.01	9	459	1.77	0.148	0.03
Sex*Day	9	459	0.49	0.793	0.01	9	459	1.28	0.275	0.02	9	459	1.36	0.235	0.03	9	459	0.82	0.496	0.02
Genotype*Sex*Day	9	459	0.84	0.529	0.02	9	459	1.66	0.15	0.03	9	459	0.37	0.888	0.01	9	459	1.36	0.254	0.03
* note = " 0" value means p value is less than 0.001
p ≥ 0.05
p ≤ 0.05

## Sheet: Tab 3 - APP PS1
PD
	Column Labels
	% Correct					Number of correction trials					Reward collection latency (s)					Correct touch latency (s)
Analysis	df1	df2	F	p	partial eta^2	df1	df2	F	p	partial eta^2	df1	df2	F	p	partial eta^2	df1	df2	F	p	partial eta^2
4 Months
Genotype h	1	45	7.84	0.008	0.15	1	45	12.33	0.001	0.22	1	45	4.22	0.046	0.09	1	44	23.55	0	0.35
Sex	1	45	0.88	0.353	0.02	1	45	0.11	0.741	0	1	45	4.09	0.049	0.08	1	44	5.61	0.022	0.11
Day	9	405	168.6	0	0.79	9	405	228.18	0	0.84	9	405	17.13	0	0.28	9	396	46.98	0	0.52
Genotype*Sex	1	45	0	0.98	0	1	45	2.63	0.112	0.06	1	45	0.5	0.485	0.01	1	44	5.53	0.023	0.11
Genotype*Day	9	405	0.71	0.562	0.02	9	405	3.53	0.007	0.07	9	405	1.32	0.253	0.03	9	396	4.48	0.005	0.09
Sex*Day	9	405	1.16	0.33	0.03	9	405	1.45	0.217	0.03	9	405	1.91	0.083	0.04	9	396	1.96	0.126	0.04
Genotype*Sex*Day	9	405	0.49	0.717	0.01	9	405	4.54	0.001	0.09	9	405	2.26	0.042	0.05	9	396	1.25	0.293	0.03
7 Months
Genotype	1	47	0.92	0.341	0.02	1	47	8.65	0.005	0.16	1	46	5.55	0.023	0.11	1	46	9.39	0.004	0.17
Sex	1	47	1.69	0.2	0.03	1	47	1.83	0.182	0.04	1	46	0.15	0.704	0	1	46	4.34	0.043	0.09
Day	9	423	188.65	0	0.8	9	423	241.72	0	0.84	9	414	9.71	0	0.17	9	414	36.86	0	0.44
Genotype*Sex	1	47	0.03	0.863	0	1	47	2.51	0.12	0.05	1	46	0.2	0.655	0	1	46	6.31	0.016	0.12
Genotype*Day	9	423	1.07	0.375	0.02	9	423	1.34	0.248	0.03	9	414	0.95	0.463	0.02	9	414	1.97	0.099	0.04
Sex*Day	9	423	1.67	0.144	0.03	9	423	2.37	0.039	0.05	9	414	2.39	0.026	0.05	9	414	2.69	0.031	0.06
Genotype*Sex*Day	9	423	1.01	0.412	0.02	9	423	3.24	0.007	0.06	9	414	0.77	0.605	0.02	9	414	2.42	0.048	0.05
10 Months
Genotype	1	36	0.33	0.568	0.01	1	36	0.15	0.702	0	1	36	0.05	0.82	0	1	36	4.54	0.04	0.11
Sex	1	36	0.3	0.586	0.01	1	36	0.13	0.723	0	1	36	1.19	0.283	0.03	1	36	0.04	0.847	0
Day	9	324	49.5	0	0.58	9	324	103.33	0	0.74	9	324	0.39	0.891	0.01	9	324	7.46	0	0.17
Genotype*Sex	1	36	0.01	0.908	0	1	36	0.13	0.723	0	1	36	1.01	0.322	0.03	1	36	2.64	0.113	0.07
Genotype*Day	9	324	0.4	0.856	0.01	9	324	0.86	0.527	0.02	9	324	0.2	0.979	0.01	9	324	2.7	0.027	0.07
Sex*Day	9	324	0.75	0.595	0.02	9	324	2.53	0.022	0.07	9	324	0.84	0.545	0.02	9	324	0.66	0.637	0.02
Genotype*Sex*Day	9	324	0.9	0.485	0.02	9	324	1.51	0.177	0.04	9	324	0.33	0.927	0.01	9	324	1.65	0.158	0.04
* note = " 0" value means p value is less than 0.001
p ≥ 0.05
p ≤ 0.05
