# Supplementary material for: MouseBytes, an open-access high-throughput pipeline and database for rodent touchscreen-based cognitive assessment
Source: eLife. 2019 Dec 11;8:e49630. doi: 10.7554/eLife.49630 (PMC6934379; doi:10.7554/eLife.49630)
Supplement: Supplementary file 5. [file elife-49630-supp5.xlsx]

## Sheet: Tab 1 -3xTG-AD
	Column Labels
	3xTG-AD
	% Correct					% Omission					# Premature responses					# Perserverative responses					Reward Collection latency (s)					Correct touch latency (s)
Analysis	df1	df2	F	p	partial eta^2	df1	df2	F	p	partial eta^2	df1	df2	F	p	partial eta^2	df1	df2	F	p	partial eta^2	df1	df2	F	p	partial eta^2	df1	df2	F	p	partial eta^2
4 Months
Female
Genotype b	1	41	6.07	0.018	0.13	1	41	3.45	0.07	0.08	1	41	7.51	0.009	0.15	1	41	4.12	0.049	0.09	1	41	0.01	0.937	0	1	41	15.83	0	0.28
Stimulus Length b	3	123	56.47	0	0.58	3	123	112.47	0	0.73	3	123	0.66	0.554	0.02	3	123	10.58	0	0.21	3	123	2.38	0.082	0.05	3	123	17.59	0	0.3
Genotype*Stimulus Length b	3	123	1.09	0.35	0.03	3	123	0.67	0.565	0.02	3	123	0.3	0.795	0.01	3	123	0.54	0.638	0.01	3	123	2.23	0.098	0.05	3	123	0.7	0.527	0.02
Male
Genotype b	1	37	6.46	0.015	0.15	1	37	0.24	0.629	0.01	1	37	0.2	0.66	0.01	1	37	0.72	0.4	0.02	1	37	11.52	0.002	0.24	1	37	14.61	0	0.28
Stimulus Length b	3	111	64.78	0	0.64	3	111	59.07	0	0.61	3	111	4.02	0.012	0.1	3	111	12.06	0	0.25	3	111	0.68	0.547	0.02	3	111	21.42	0	0.37
Genotype*Stimulus Length b	3	111	0.96	0.399	0.03	3	111	0.69	0.553	0.02	3	111	0.04	0.982	0	3	111	0.93	0.406	0.02	3	111	0.29	0.81	0.01	3	111	0.27	0.81	0.01
7 Months
Female
Genotype b	1	41	11.96	0.001	0.23	1	41	1.23	0.273	0.03	1	41	0.03	0.853	0	1	41	6.62	0.014	0.14	1	41	0.2	0.658	0	1	41	11.63	0.001	0.22
Stimulus Length b	3	123	83.2	0	0.67	3	123	69.82	0	0.63	3	123	6.49	0.002	0.14	3	123	5.94	0.001	0.13	3	123	1.36	0.26	0.03	3	123	17.3	0	0.3
Genotype*Stimulus Length b	3	123	2.35	0.082	0.05	3	123	1.47	0.232	0.03	3	123	0.49	0.617	0.01	3	123	1.68	0.18	0.04	3	123	0.63	0.571	0.02	3	123	0.46	0.657	0.01
Male
Genotype b	1	35	2.5	0.123	0.07	1	35	0.06	0.815	0	1	35	0.03	0.866	0	1	35	0.11	0.738	0	1	35	2.61	0.115	0.07	1	35	11.89	0.001	0.25
Stimulus Length b	3	105	59.03	0	0.63	3	105	66.11	0	0.65	3	105	2.93	0.046	0.08	3	105	5.43	0.004	0.13	3	105	0.82	0.475	0.02	3	105	31.91	0	0.48
Genotype*Stimulus Length b	3	105	3.48	0.026	0.09	3	105	0.05	0.981	0	3	105	0.42	0.706	0.01	3	105	1.24	0.298	0.03	3	105	3.63	0.02	0.09	3	105	1.32	0.274	0.04
10 Months
Female
Genotype b	1	40	4.93	0.032	0.11	1	40	0.27	0.607	0.01	1	40	0.02	0.896	0	1	40	4.06	0.051	0.09	1	40	0.78	0.381	0.02	1	40	13.3	0.001	0.25
Stimulus Length b	3	120	71.77	0	0.64	3	120	59.24	0	0.6	3	120	3.29	0.035	0.08	3	120	7.74	0	0.16	3	120	1.46	0.232	0.04	3	120	16.99	0	0.3
Genotype*Stimulus Length b	3	120	2	0.129	0.05	3	120	1.44	0.24	0.03	3	120	0.1	0.93	0	3	120	2.59	0.065	0.06	3	120	0.7	0.54	0.02	3	120	0.63	0.579	0.02
Male
Genotype b	1	33	7.7	0.009	0.19	1	33	3.12	0.087	0.09	1	33	0	0.947	0	1	33	0.57	0.457	0.02	1	33	0.01	0.903	0	1	32	2.6	0.117	0.08
Stimulus Length b	3	99	18.48	0	0.36	3	99	44.33	0	0.57	3	99	1.18	0.317	0.03	3	99	3.7	0.018	0.1	3	99	0.46	0.642	0.01	3	96	9.21	0	0.22
Genotype*Stimulus Length b	3	99	0.91	0.403	0.03	3	99	1.75	0.169	0.05	3	99	0.4	0.702	0.01	3	99	0.2	0.877	0.01	3	99	1.13	0.332	0.03	3	96	1.03	0.366	0.03
* note = " 0" value means p value is less than 0.001
p ≥ 0.05
p ≤ 0.05

## Sheet: Tab 2 - 5xFAD
	Column Labels
	5xFAD
	% Correct					% Omission					# Premature responses					# Perserverative responses					Reward Collection latency (s)					Correct touch latency (s)
Analysis	df1	df2	F	p	partial eta^2	df1	df2	F	p	partial eta^2	df1	df2	F	p	partial eta^2	df1	df2	F	p	partial eta^2	df1	df2	F	p	partial eta^2	df1	df2	F	p	partial eta^2
4 Months
Female
Genotype i	1	40	0.92	0.343	0.02	1	40	0.01	0.905	0	1	40	0.27	0.609	0.01	1	40	0.36	0.549	0.01	1	40	20.38	0	0.34	1	40	0.11	0.742	0
Stimulus Length	3	120	75.34	0	0.65	3	120	51.19	0	0.56	3	120	1.96	0.147	0.05	3	120	7.86	0	0.16	3	120	1.04	0.372	0.03	3	120	41.95	0	0.51
Genotype*Stimulus Length	3	120	3.3	0.03	0.08	3	120	2.15	0.103	0.05	3	120	0.74	0.481	0.02	3	120	0.08	0.955	0	3	120	0.43	0.704	0.01	3	120	0.65	0.544	0.02
Male
Genotype i	1	41	0.69	0.411	0.02	1	41	0.17	0.679	0	1	41	0	0.994	0	1	41	0.56	0.458	0.01	1	41	6.25	0.017	0.13	1	41	6.07	0.018	0.13
Stimulus Length	3	123	61.39	0	0.6	3	123	83.8	0	0.67	3	123	4.21	0.009	0.09	3	123	6.84	0	0.14	3	123	0.23	0.849	0.01	3	123	36.97	0	0.47
Genotype*Stimulus Length	3	123	1.28	0.283	0.03	3	123	0.67	0.539	0.02	3	123	3.27	0.027	0.07	3	123	0.55	0.64	0.01	3	123	0.71	0.531	0.02	3	123	0.27	0.819	0.01
7 Months
Female
Genotype e i	1	37	6.26	0.017	0.14	1	37	1.69	0.201	0.04	1	37	1.31	0.259	0.03	1	37	11.19	0.002	0.23	1	37	17.35	0	0.32	1	37	0.72	0.4	0.02
Stimulus Length	3	111	67.2	0	0.64	3	111	46.59	0	0.56	3	111	2.08	0.13	0.05	3	111	7.33	0	0.17	3	111	1.57	0.202	0.04	3	111	30.47	0	0.45
Genotype*Stimulus Length	3	111	1.55	0.213	0.04	3	111	0.87	0.443	0.02	3	111	0.08	0.929	0	3	111	0.26	0.825	0.01	3	111	0.47	0.689	0.01	3	111	1.19	0.314	0.03
Male
Genotype i	1	41	3.25	0.079	0.07	1	41	1.13	0.293	0.03	1	41	2.84	0.1	0.06	1	41	10.43	0.002	0.2	1	41	15.2	0	0.27	1	41	20.9	0	0.34
Stimulus Length	3	123	42.26	0	0.51	3	123	43.91	0	0.52	3	123	3.54	0.023	0.08	3	123	8.55	0	0.17	3	123	0.15	0.924	0	3	123	32.74	0	0.44
Genotype*Stimulus Length	3	123	0.93	0.417	0.02	3	123	0.83	0.468	0.02	3	123	0.7	0.532	0.02	3	123	2.06	0.118	0.05	3	123	2.14	0.101	0.05	3	123	0.05	0.978	0
10 Months
Female
Genotype e i	1	33	8.65	0.006	0.21	1	33	1.23	0.276	0.04	1	33	0.51	0.478	0.02	1	33	7.96	0.008	0.19	1	33	27.84	0	0.46	1	33	1.07	0.308	0.03
Stimulus Length	3	99	62.15	0	0.65	3	99	46.51	0	0.58	3	99	4.8	0.009	0.13	3	99	4.55	0.009	0.12	3	99	0.49	0.686	0.01	3	99	42.31	0	0.56
Genotype*Stimulus Length	3	99	0.81	0.481	0.02	3	99	4.64	0.007	0.12	3	99	0.17	0.865	0.01	3	99	0.22	0.842	0.01	3	99	0.27	0.837	0.01	3	99	0.25	0.851	0.01
Male
Genotype e i	1	40	3.7	0.062	0.08	1	40	8.11	0.007	0.17	1	40	0	0.982	0	1	40	9.14	0.004	0.19	1	40	28.13	0	0.41	1	40	26.06	0	0.39
Stimulus Length	3	120	82.65	0	0.67	3	120	48.97	0	0.55	3	120	4.91	0.005	0.11	3	120	8.79	0	0.18	3	120	2.89	0.044	0.07	3	120	51.34	0	0.56
Genotype*Stimulus Length	3	120	1.23	0.3	0.03	3	120	1.74	0.172	0.04	3	120	1.91	0.142	0.05	3	120	0.36	0.711	0.01	3	120	1.54	0.212	0.04	3	120	1.46	0.234	0.04
* note = " 0" value means p value is less than 0.001
p ≥ 0.05
p ≤ 0.05

## Sheet: Tab 3 - APP PS1
	Column Labels
	APP/PS1
	% Correct					% Omission					# Premature responses					# Perserverative responses					Reward Collection latency (s)					Correct touch latency (s)
Analysis	df1	df2	F	p	partial eta^2	df1	df2	F	p	partial eta^2	df1	df2	F	p	partial eta^2	df1	df2	F	p	partial eta^2	df1	df2	F	p	partial eta^2	df1	df2	F	p	partial eta^2
4 Months
Female
Genotype	1	52	6.13	0.017	0.11	1	52	9.43	0.003	0.15	1	52	0.63	0.432	0.01	1	52	5.05	0.029	0.09	1	52	0.91	0.345	0.02	1	52	9.15	0.004	0.15
Stimulus Length	3	156	69.49	0	0.57	3	156	83.49	0	0.62	3	156	2.62	0.057	0.05	3	156	7.66	0	0.13	3	156	0.91	0.431	0.02	3	156	33.99	0	0.4
Genotype*Stimulus Length	3	156	0.42	0.701	0.01	3	156	0.81	0.474	0.02	3	156	2.68	0.053	0.05	3	156	0.44	0.71	0.01	3	156	0.2	0.886	0	3	156	1.01	0.386	0.02
Male
Genotype	1	48	0.81	0.372	0.02	1	48	0.04	0.841	0	1	48	0.51	0.478	0.01	1	48	8.58	0.005	0.15	1	48	0.98	0.327	0.02	1	48	0	0.948	0
Stimulus Length	3	144	69.66	0	0.59	3	144	76.1	0	0.61	3	144	1.96	0.129	0.04	3	144	6.53	0	0.12	3	144	2.77	0.05	0.05	3	144	52.72	0	0.52
Genotype*Stimulus Length	3	144	0.54	0.642	0.01	3	144	2.03	0.126	0.04	3	144	1.73	0.169	0.03	3	144	0.57	0.636	0.01	3	144	0.6	0.597	0.01	3	144	0.94	0.422	0.02
7 Months
Female
Genotype	1	41	0	0.993	0	1	41	9.65	0.003	0.19	1	41	1.12	0.296	0.03	1	41	0	0.964	0	1	41	3.77	0.059	0.08	1	41	1.53	0.224	0.04
Stimulus Length	3	123	49.08	0	0.54	3	123	73.1	0	0.64	3	123	0.09	0.943	0	3	123	2.8	0.052	0.06	3	123	0.76	0.512	0.02	3	123	18.63	0	0.31
Genotype*Stimulus Length	3	123	0.58	0.622	0.01	3	123	3.16	0.03	0.07	3	123	0.05	0.971	0	3	123	0.27	0.817	0.01	3	123	0.3	0.815	0.01	3	123	1.19	0.313	0.03
Male
Genotype	1	47	3.2	0.08	0.06	1	47	1.29	0.262	0.03	1	47	0.34	0.56	0.01	1	47	4.92	0.031	0.09	1	47	4.26	0.044	0.08	1	47	0.13	0.722	0
Stimulus Length	3	141	57.44	0	0.55	3	141	59.27	0	0.56	3	141	4.08	0.01	0.08	3	141	6.67	0.001	0.12	3	141	1.91	0.14	0.04	3	141	42.96	0	0.48
Genotype*Stimulus Length	3	141	1.64	0.185	0.03	3	141	0.59	0.605	0.01	3	141	0.8	0.489	0.02	3	141	0.53	0.637	0.01	3	141	0.26	0.826	0.01	3	141	0.95	0.413	0.02
10 Months
Female
Genotype	1	35	0.04	0.845	0	1	35	1.81	0.187	0.05	1	35	0.42	0.522	0.01	1	35	0.01	0.911	0	1	35	1.65	0.208	0.04	1	35	0.29	0.594	0.01
Stimulus Length	3	105	25.86	0	0.42	3	105	41.92	0	0.54	3	105	3.06	0.034	0.08	3	105	1.16	0.326	0.03	3	105	0.54	0.563	0.02	3	105	22.41	0	0.39
Genotype*Stimulus Length	3	105	0.21	0.882	0.01	3	105	0.11	0.934	0	3	105	1.05	0.371	0.03	3	105	0.25	0.85	0.01	3	105	0.59	0.54	0.02	3	105	0.36	0.756	0.01
Male
Genotype	1	45	1.58	0.216	0.03	1	45	3.81	0.057	0.08	1	45	1.4	0.243	0.03	1	45	1.84	0.182	0.04	1	45	5.8	0.02	0.11	1	45	0.25	0.618	0.01
Stimulus Length	3	135	33.78	0	0.43	3	135	55.53	0	0.55	3	135	0.57	0.611	0.01	3	135	2.02	0.118	0.04	3	135	0.67	0.564	0.01	3	135	51.54	0	0.53
Genotype*Stimulus Length	3	135	2.6	0.063	0.05	3	135	0.71	0.54	0.02	3	135	1.88	0.145	0.04	3	135	1.3	0.277	0.03	3	135	1.19	0.317	0.03	3	135	1.13	0.335	0.02
* note = " 0" value means p value is less than 0.001
p ≥ 0.05
p ≤ 0.05
