# Supplementary material for: MouseBytes, an open-access high-throughput pipeline and database for rodent touchscreen-based cognitive assessment
Source: eLife. 2019 Dec 11;8:e49630. doi: 10.7554/eLife.49630 (PMC6934379; doi:10.7554/eLife.49630)
Supplement: Supplementary file 6. [file elife-49630-supp6.xlsx]

## Sheet: Tab 1 - 3xTG-AD
PAL
	Column Labels
	3xTG-AD
	% Correct					# Correction Trials					Reward Collection Latency (s)					Correct Touch Latency (s)
Analysis	df1	df2	F	p	partial eta^2	df1	df2	F	p	partial eta^2	df1	df2	F	p	partial eta^2	df1	df2	F	p	partial eta^2
4 Months
Female
Genotype	1	20	0.03	0.864	0	1	20	0.01	0.929	0	1	20	10.23	0.005	0.34	1	20	0.05	0.826	0
Week	8	160	73.62	0	0.79	8	160	55.13	0	0.73	8	160	19.24	0	0.49	8	160	20.84	0	0.51
Genotype*Week	8	160	1.05	0.382	0.05	8	160	0.71	0.546	0.03	8	160	0.99	0.417	0.05	8	160	0.26	0.815	0.01
Male
Genotype d	1	25	13.42	0.001	0.35	1	25	2.5	0.126	0.09	1	25	5.58	0.026	0.18	1	25	2.12	0.158	0.08
Week	8	200	116.36	0	0.82	8	200	88.57	0	0.78	8	200	17.09	0	0.41	8	200	17.59	0	0.41
Genotype*Week	8	200	0.47	0.729	0.02	8	200	1.64	0.181	0.06	8	200	0.26	0.839	0.01	8	200	0.7	0.519	0.03
10 Months
Female
Genotype	1	19	0.12	0.731	0.01	1	19	0.03	0.855	0	1	19	6.66	0.018	0.26	1	19	0	0.973	0
Week	8	152	29	0	0.6	8	152	56.3	0	0.75	8	152	5.98	0	0.24	8	152	8.37	0	0.31
Genotype*Week	8	152	0.53	0.684	0.03	8	152	1.13	0.349	0.06	8	152	0.49	0.753	0.03	8	152	0.83	0.505	0.04
Male
Genotype	1	25	0.87	0.361	0.03	1	25	0.1	0.749	0	1	25	5.83	0.023	0.19	1	25	0.38	0.542	0.02
Week	8	200	21.14	0	0.46	8	200	41.75	0	0.63	8	200	8.08	0	0.24	8	200	19.2	0	0.43
Genotype*Week	8	200	0.25	0.933	0.01	8	200	2.4	0.06	0.09	8	200	2.13	0.075	0.08	8	200	0.53	0.733	0.02
* note = " 0" value means p value is less than 0.001
p ≥ 0.05
p ≤ 0.05

## Sheet: Tab 2 - 5xFAD
PAL
	Column Labels
	5xFAD
	% Correct					# Correction Trials					Reward Collection Latency (s)					Correct Touch Latency (s)
Analysis	df1	df2	F	p	partial eta^2	df1	df2	F	p	partial eta^2	df1	df2	F	p	partial eta^2	df1	df2	F	p	partial eta^2
4 Months
Female
Genotype i	1	30	1.14	0.294	0.04	1	30	2.44	0.129	0.08	1	29	28.66	0	0.5	1	29	0.07	0.789	0
Week	8	240	28.36	0	0.49	8	240	33.95	0	0.53	8	232	0.57	0.621	0.02	8	232	13.37	0	0.32
Genotype*Week	8	240	1.03	0.392	0.03	8	240	2.35	0.067	0.07	8	232	1	0.394	0.03	8	232	0.8	0.489	0.03
Male
Genotype i	1	28	1.29	0.266	0.04	1	28	2.92	0.099	0.09	1	28	9.83	0.004	0.26	1	28	4.68	0.039	0.14
Week	8	224	56.35	0	0.67	8	224	79.44	0	0.74	8	224	26.36	0	0.48	8	224	20.58	0	0.42
Genotype*Week	8	224	1.32	0.272	0.04	8	224	0.66	0.599	0.02	8	224	0.89	0.47	0.03	8	224	0.83	0.482	0.03
10 Months
Female
Genotype f i	1	29	4.94	0.034	0.15	1	29	9.22	0.005	0.24	1	29	70.57	0	0.71	1	29	5.9	0.022	0.17
Week	8	232	25.2	0	0.46	8	232	20.04	0	0.41	8	232	5.38	0.001	0.16	8	232	4.8	0.001	0.14
Genotype*Week f	8	232	6.63	0	0.19	8	232	2.52	0.032	0.08	8	232	3.4	0.019	0.11	8	232	1.19	0.321	0.04
Male
Genotype f i	1	26	25.85	0	0.5	1	26	31.67	0	0.55	1	26	47.71	0	0.65	1	26	1.12	0.299	0.04
Week	8	208	56.38	0	0.68	8	208	45.24	0	0.64	8	208	8.4	0	0.24	8	208	1.19	0.322	0.04
Genotype*Week f	8	208	7.21	0	0.22	8	208	3.52	0.007	0.12	8	208	4.8	0.004	0.16	8	208	1.46	0.225	0.05
* note = " 0" value means p value is less than 0.001
p ≥ 0.05
p ≤ 0.05

## Sheet: Tab 3 - APP PS1
PAL
	Column Labels
	APP/PS1
	% Correct					# Correction Trials					Reward Collection Latency (s)					Correct Touch Latency (s)
Analysis	df1	df2	F	p	partial eta^2	df1	df2	F	p	partial eta^2	df1	df2	F	p	partial eta^2	df1	df2	F	p	partial eta^2
4 Months
Female
Genotype g	1	24	8	0.009	0.25	1	24	0.52	0.478	0.02	1	24	0.1	0.76	0	1	24	25.3	0	0.51
Week	8	192	75.14	0	0.76	8	192	90.13	0	0.79	8	192	14.36	0	0.37	8	192	13.44	0	0.36
Genotype*Week	8	192	1.41	0.237	0.06	8	192	6.86	0	0.22	8	192	4.59	0.002	0.16	8	192	5.07	0.001	0.17
Male
Genotype g	1	20	6.84	0.017	0.25	1	20	6.45	0.02	0.24	1	20	0.29	0.596	0.01	1	20	11.36	0.003	0.36
Week	8	160	53.7	0	0.73	8	160	82.95	0	0.81	8	160	3.47	0.017	0.15	8	160	19.72	0	0.5
Genotype*Week	8	160	2.85	0.034	0.12	8	160	1.72	0.17	0.08	8	160	1.64	0.184	0.08	8	160	0.55	0.664	0.03
10 Months
Female
Genotype	1	16	0.11	0.74	0.01	1	16	0	0.974	0	1	16	5.98	0.026	0.27	1	16	0.14	0.716	0.01
Week	8	128	57.52	0	0.78	8	128	58.06	0	0.78	8	128	2.02	0.11	0.11	8	128	17.4	0	0.52
Genotype*Week	8	128	1.38	0.251	0.08	8	128	1.83	0.147	0.1	8	128	2.2	0.087	0.12	8	128	1.42	0.246	0.08
Male
Genotype	1	12	1.71	0.215	0.12	1	12	2.22	0.162	0.16	1	12	0.47	0.504	0.04	1	12	0.63	0.442	0.05
Week	8	96	29.78	0	0.71	8	96	36.56	0	0.75	8	96	15.91	0	0.57	8	96	3.89	0.024	0.24
Genotype*Week	8	96	0.57	0.693	0.05	8	96	0.13	0.939	0.01	8	96	2.09	0.092	0.15	8	96	0.6	0.593	0.05
* note = " 0" value means p value is less than 0.001
p ≥ 0.05
p ≤ 0.05
