# Supplementary material for: MouseBytes, an open-access high-throughput pipeline and database for rodent touchscreen-based cognitive assessment
Source: eLife. 2019 Dec 11;8:e49630. doi: 10.7554/eLife.49630 (PMC6934379; doi:10.7554/eLife.49630)
Supplement: Supplementary file 7. [file elife-49630-supp7.xlsx]

## Sheet: Tab 1 - 3xTG-AD
PD
	Column Labels
	3xTG-AD
	% Correct					Number of correction trials					Reward collection latency (s)					Correct touch latency (s)
Analysis	df1	df2	F	p	partial eta^2	df1	df2	F	p	partial eta^2	df1	df2	F	p	partial eta^2	df1	df2	F	p	partial eta^2
4 Months
Female
Genotype	1	27	1.31	0.263	0.05	1	27	0.42	0.524	0.02	1	25	0.02	0.888	0	1	26	8.12	0.008	0.24
Genotype*Day	9	243	0.87	0.478	0.03	9	243	0.23	0.929	0.01	9	225	1.3	0.275	0.05	9	234	1.58	0.177	0.06
Day	9	243	76.48	0	0.74	9	243	90.31	0	0.77	9	225	3.76	0.008	0.13	9	234	18.02	0	0.41
Male
Genotype	1	26	5.41	0.028	0.17	1	26	1.86	0.184	0.07	1	23	0.87	0.36	0.04	1	23	1.75	0.199	0.07
Genotype*Day	9	234	0.94	0.451	0.04	9	234	1.72	0.161	0.06	9	207	1.12	0.353	0.05	9	207	0.63	0.661	0.03
Day	9	234	75.73	0	0.74	9	234	86.43	0	0.77	9	207	1.6	0.164	0.07	9	207	20.77	0	0.47
7 Months
Female
Genotype	1	28	0.01	0.938	0	1	28	0.02	0.88	0	1	28	0.28	0.6	0.01	1	28	7.15	0.012	0.2
Genotype*Day	9	252	1.87	0.119	0.06	9	252	1.26	0.294	0.04	9	252	1.29	0.277	0.04	9	252	0.94	0.432	0.03
Day	9	252	146.45	0	0.84	9	252	186.59	0	0.87	9	252	2.99	0.017	0.1	9	252	24.25	0	0.46
Male
Genotype	1	27	0.13	0.72	0	1	27	0.05	0.825	0	1	27	0.08	0.777	0	1	27	0.75	0.393	0.03
Genotype*Day	9	243	0.79	0.549	0.03	9	243	0.81	0.523	0.03	9	243	2.7	0.022	0.09	9	243	1.11	0.348	0.04
Day	9	243	101.23	0	0.79	9	243	83.17	0	0.75	9	243	2.86	0.016	0.1	9	243	23.26	0	0.46
10 Months
Female
Genotype	1	25	0.1	0.756	0	1	25	0.25	0.622	0.01	1	25	0.48	0.495	0.02	1	25	0.36	0.555	0.01
Genotype*Day	9	225	0.62	0.679	0.02	9	225	0.52	0.737	0.02	9	225	0.68	0.623	0.03	9	225	1.97	0.127	0.07
Day	9	225	68.67	0	0.73	9	225	115.44	0	0.82	9	225	1.55	0.188	0.06	9	225	18.53	0	0.43
Male
Genotype	1	25	0.19	0.666	0.01	1	25	0.04	0.836	0	1	25	0.22	0.643	0.01	1	25	5.7	0.025	0.19
Genotype*Day	9	225	1.83	0.136	0.07	9	225	1.76	0.144	0.07	9	225	0.65	0.686	0.03	9	225	2.58	0.061	0.09
Day	9	225	46	0	0.65	9	225	93.57	0	0.79	9	225	1.21	0.306	0.05	9	225	12.44	0	0.33
* note = " 0" value means p value is less than 0.001
p ≥ 0.05
p ≤ 0.05

## Sheet: Tab 2 - 5xFAD
PD
	Column Labels
	5xFAD
	% Correct					Number of correction trials					Reward collection latency (s)					Correct touch latency (s)
Analysis	df1	df2	F	p	partial eta^2	df1	df2	F	p	partial eta^2	df1	df2	F	p	partial eta^2	df1	df2	F	p	partial eta^2
4 Months
Female
Genotype i	1	37	0.06	0.815	0	1	37	0.91	0.346	0.02	1	37	21.75	0	0.37	1	37	9.74	0.003	0.21
Genotype*Day	9	333	1.04	0.393	0.03	9	333	1.61	0.175	0.04	9	333	0.55	0.722	0.01	9	333	2.03	0.113	0.05
Day	9	333	65.39	0	0.64	9	333	105.41	0	0.74	9	333	8.2	0	0.18	9	333	23.63	0	0.39
Male
Genotype	1	20	0.19	0.671	0.01	1	20	2.49	0.131	0.11	1	19	3.29	0.085	0.15	1	18	3.31	0.086	0.16
Genotype*Day	9	180	1.05	0.395	0.05	9	180	1.44	0.227	0.07	9	171	0.47	0.731	0.02	9	162	0.73	0.569	0.04
Day	9	180	27.72	0	0.58	9	180	37.74	0	0.65	9	171	3.2	0.023	0.14	9	162	9.09	0	0.34
7 Months
Female
Genotype i	1	34	4.02	0.053	0.11	1	34	7.99	0.008	0.19	1	34	53.79	0	0.61	1	34	8.83	0.005	0.21
Genotype*Day	9	306	1.09	0.37	0.03	9	306	1.45	0.219	0.04	9	306	2.05	0.085	0.06	9	306	1.6	0.175	0.04
Day	9	306	108.49	0	0.76	9	306	162.94	0	0.83	9	306	8.45	0	0.2	9	306	41.44	0	0.55
Male
Genotype i	1	24	0.27	0.61	0.01	1	24	0.04	0.841	0	1	24	12.01	0.002	0.33	1	24	2.23	0.148	0.09
Genotype*Day	9	216	2.45	0.036	0.09	9	216	0.87	0.472	0.04	9	216	1.27	0.276	0.05	9	216	0.81	0.517	0.03
Day	9	216	78.65	0	0.77	9	216	77.19	0	0.76	9	216	1.12	0.354	0.04	9	216	29.99	0	0.56
10 Months
Female
Genotype i	1	25	1.09	0.306	0.04	1	25	0	0.987	0	1	25	45.97	0	0.65	1	25	10.55	0.003	0.3
Genotype*Day	9	225	0.9	0.486	0.03	9	225	1.19	0.318	0.05	9	225	0.4	0.828	0.02	9	225	2.05	0.112	0.08
Day	9	225	35.01	0	0.58	9	225	55.73	0	0.69	9	225	1.25	0.294	0.05	9	225	7.31	0	0.23
Male
Genotype i	1	26	2.57	0.121	0.09	1	26	0.01	0.942	0	1	26	35.8	0	0.58	1	26	15.18	0.001	0.37
Genotype*Day	9	234	1.35	0.251	0.05	9	234	0.85	0.503	0.03	9	234	0.71	0.6	0.03	9	234	0.97	0.402	0.04
Day	9	234	29.9	0	0.53	9	234	73.92	0	0.74	9	234	0.91	0.469	0.03	9	234	11.24	0	0.3
* note = " 0" value means p value is less than 0.001
p ≥ 0.05
p ≤ 0.05

## Sheet: Tab 3 - APP PS1
PD
	Column Labels
	APP/PS1
	% Correct					Number of correction trials					Reward collection latency (s)					Correct touch latency (s)
Analysis	df1	df2	F	p	partial eta^2	df1	df2	F	p	partial eta^2	df1	df2	F	p	partial eta^2	df1	df2	F	p	partial eta^2
4 Months
Female
Genotype h	1	21	4.91	0.038	0.19	1	21	16.21	0.001	0.44	1	21	4.84	0.039	0.19	1	20	20.67	0	0.51
Genotype*Day	9	189	0.62	0.645	0.03	9	189	6.88	0	0.25	9	189	2.76	0.03	0.12	9	180	4.48	0.006	0.18
Day	9	189	93.84	0	0.82	9	189	115.8	0	0.85	9	189	11.52	0	0.35	9	180	31.68	0	0.61
Male
Genotype	1	24	3.41	0.077	0.12	1	24	1.58	0.221	0.06	1	24	0.79	0.382	0.03	1	24	3.93	0.059	0.14
Genotype*Day	9	216	0.59	0.603	0.02	9	216	0.9	0.468	0.04	9	216	0.62	0.685	0.03	9	216	1.02	0.379	0.04
Day	9	216	76.08	0	0.76	9	216	114.12	0	0.83	9	216	7.09	0	0.23	9	216	16.26	0	0.4
7 Months
Female
Genotype	1	22	0.38	0.543	0.02	1	22	10.97	0.003	0.33	1	22	5.47	0.029	0.2	1	22	11.01	0.003	0.33
Genotype*Day	9	198	0.53	0.732	0.02	9	198	4.59	0.001	0.17	9	198	0.83	0.536	0.04	9	198	3.23	0.019	0.13
Day	9	198	91.24	0	0.81	9	198	138.64	0	0.86	9	198	7.08	0	0.24	9	198	22.49	0	0.51
Male
Genotype	1	25	0.58	0.455	0.02	1	25	0.89	0.353	0.03	1	24	1.49	0.234	0.06	1	24	0.23	0.633	0.01
Genotype*Day	9	225	1.66	0.162	0.06	9	225	0.54	0.712	0.02	9	216	0.87	0.509	0.03	9	216	0.34	0.808	0.01
Day	9	225	99.39	0	0.8	9	225	114.74	0	0.82	9	216	4.4	0.001	0.15	9	216	14.21	0	0.37
10 Months
Female
Genotype	1	15	0.23	0.636	0.02	1	15	0.41	0.532	0.03	1	15	0.97	0.34	0.06	1	15	4.29	0.056	0.22
Genotype*Day	9	135	0.48	0.757	0.03	9	135	1.15	0.34	0.07	9	135	0.23	0.935	0.02	9	135	2.21	0.087	0.13
Day	9	135	25.81	0	0.63	9	135	53.55	0	0.78	9	135	0.63	0.662	0.04	9	135	3.08	0.028	0.17
Male
Genotype	1	21	0.13	0.726	0.01	1	21	0	0.984	0	1	21	0.32	0.578	0.01	1	21	0.22	0.643	0.01
Genotype*Day	9	189	0.96	0.446	0.04	9	189	1.35	0.245	0.06	9	189	0.32	0.918	0.01	9	189	0.61	0.672	0.03
Day	9	189	25.96	0	0.55	9	189	57.7	0	0.73	9	189	0.53	0.77	0.02	9	189	4.97	0.001	0.19
* note = " 0" value means p value is less than 0.001
p ≥ 0.05
p ≤ 0.05
