# Supplementary material for: MouseBytes, an open-access high-throughput pipeline and database for rodent touchscreen-based cognitive assessment
Source: eLife. 2019 Dec 11;8:e49630. doi: 10.7554/eLife.49630 (PMC6934379; doi:10.7554/eLife.49630)
Supplement: Supplementary file 8. [file elife-49630-supp8.xlsx]

## Sheet: Tab 1 - 3xTG-AD
	Column Labels
	3xTG-AD
	% Correct					% Omission
Analysis	df1	df2	F	p	partial eta^2	df1	df2	F	p	partial eta^2
4 Months
Female
Block	4	124	1.38	0.249	0.04	4	132	1.45	0.235	0.04
Genotype c	1	31	6.94	0.013	0.18	1	33	2.4	0.131	0.07
Stimulus Length	3	93	25.52	0	0.45	3	99	34.79	0	0.51
Genotype*Block	4	124	1.06	0.374	0.03	4	132	0.41	0.739	0.01
Genotype*Stimulus Length	3	93	1.17	0.322	0.04	3	99	0.19	0.89	0.01
Stimulus Length*Block	12	372	1.98	0.06	0.06	12	396	1.45	0.177	0.04
Genotype*Stimulus Length*Block c	12	372	2.54	0.016	0.08	12	396	1	0.435	0.03
Male
Block	4	96	1.17	0.328	0.05	4	104	1.11	0.353	0.04
Genotype	1	24	1.55	0.225	0.06	1	26	0.49	0.488	0.02
Stimulus Length	3	72	19.57	0	0.45	3	78	26.4	0	0.5
Genotype*Block	4	96	0.96	0.425	0.04	4	104	0.45	0.733	0.02
Genotype*Stimulus Length	3	72	0.28	0.779	0.01	3	78	1.86	0.152	0.07
Stimulus Length*Block	12	288	1.26	0.273	0.05	12	312	1.22	0.292	0.04
Genotype*Stimulus Length*Block	12	288	0.63	0.734	0.03	12	312	1.29	0.251	0.05
7 Months
Female
Block	4	124	0.96	0.428	0.03	4	132	7.94	0	0.19
Genotype	1	31	7.42	0.01	0.19	1	33	0.43	0.515	0.01
Stimulus Length	3	93	34.7	0	0.53	3	99	27.49	0	0.45
Genotype*Block	4	124	0.75	0.545	0.02	4	132	0.93	0.432	0.03
Genotype*Stimulus Length	3	93	1.29	0.283	0.04	3	99	1.09	0.347	0.03
Stimulus Length*Block	12	372	0.7	0.682	0.02	12	396	2.33	0.022	0.07
Genotype*Stimulus Length*Block	12	372	0.64	0.728	0.02	12	396	1.66	0.112	0.05
Male
Block	4	96	1.04	0.383	0.04	4	104	5.37	0.001	0.17
Genotype	1	24	3.38	0.078	0.12	1	26	0.01	0.926	0
Stimulus Length	3	72	26.72	0	0.53	3	78	20.23	0	0.44
Genotype*Block	4	96	0.36	0.808	0.01	4	104	2.06	0.097	0.07
Genotype*Stimulus Length	3	72	4.62	0.009	0.16	3	78	0.57	0.607	0.02
Stimulus Length*Block	12	288	1.07	0.385	0.04	12	312	0.48	0.863	0.02
Genotype*Stimulus Length*Block	12	288	1.7	0.104	0.07	12	312	0.37	0.928	0.01
10 Months
Female
Block	4	124	3.05	0.027	0.09	4	132	9.23	0	0.22
Genotype	1	31	3.46	0.072	0.1	1	33	0.01	0.934	0
Stimulus Length	3	93	25.2	0	0.45	3	99	27.96	0	0.46
Genotype*Block	4	124	1.72	0.161	0.05	4	132	2.3	0.084	0.07
Genotype*Stimulus Length	3	93	0.56	0.596	0.02	3	99	1.11	0.343	0.03
Stimulus Length*Block	12	372	1.57	0.148	0.05	12	396	1.24	0.282	0.04
Genotype*Stimulus Length*Block	12	372	1.07	0.385	0.03	12	396	1.39	0.212	0.04
Male
Block	4	96	0.43	0.735	0.02	4	104	3.84	0.011	0.13
Genotype	1	24	4.02	0.056	0.14	1	26	1.64	0.211	0.06
Stimulus Length	3	72	15.15	0	0.39	3	78	21.98	0	0.46
Genotype*Block c	4	96	0.28	0.849	0.01	4	104	0.51	0.692	0.02
Genotype*Stimulus Length	3	72	1.3	0.281	0.05	3	78	1.62	0.198	0.06
Stimulus Length*Block	12	288	1.84	0.085	0.07	12	312	0.93	0.476	0.03
Genotype*Stimulus Length*Block c	12	288	2.22	0.037	0.08	12	312	0.83	0.557	0.03

## Sheet: Tab 2 -5xFAD
	Column Labels
	5xFAD
	% Correct					% Omission
Analysis	df1	df2	F	p	partial eta^2	df1	df2	F	p	partial eta^2
4 Months
Female
Block	4	120	2.09	0.092	0.06	4	124	1.4	0.25	0.04
Genotype	1	30	0.14	0.715	0	1	31	0.02	0.888	0
Stimulus Length	3	90	16.43	0	0.35	3	93	15.54	0	0.33
Genotype*Block	4	120	0.84	0.497	0.03	4	124	1.3	0.281	0.04
Genotype*Stimulus Length	3	90	2.84	0.055	0.09	3	93	2.35	0.086	0.07
Stimulus Length*Block	12	360	1.54	0.156	0.05	12	372	1.54	0.15	0.05
Genotype*Stimulus Length*Block	12	360	1.49	0.17	0.05	12	372	0.71	0.678	0.02
Male
Block	4	92	2.79	0.039	0.11	4	112	2.67	0.054	0.09
Genotype	1	23	1.68	0.208	0.07	1	28	0.29	0.597	0.01
Stimulus Length	3	69	33.74	0	0.59	3	84	38.64	0	0.58
Genotype*Block	4	92	0.82	0.499	0.03	4	112	0.51	0.678	0.02
Genotype*Stimulus Length	3	69	0.92	0.42	0.04	3	84	0.91	0.423	0.03
Stimulus Length*Block	12	276	1.62	0.134	0.07	12	336	1.77	0.088	0.06
Genotype*Stimulus Length*Block	12	276	1.22	0.293	0.05	12	336	0.66	0.721	0.02
7 Months
Female
Block	4	120	1.15	0.335	0.04	4	124	2.88	0.045	0.09
Genotype	1	30	7.98	0.008	0.21	1	31	0.85	0.364	0.03
Stimulus Length	3	90	29.07	0	0.49	3	93	14.32	0	0.32
Genotype*Block	4	120	0.48	0.736	0.02	4	124	0.75	0.516	0.02
Genotype*Stimulus Length	3	90	2	0.133	0.06	3	93	0.73	0.511	0.02
Stimulus Length*Block	12	360	1.68	0.099	0.05	12	372	0.84	0.564	0.03
Genotype*Stimulus Length*Block	12	360	1.68	0.1	0.05	12	372	1.4	0.203	0.04
Male
Block	4	92	3.53	0.013	0.13	4	112	3.65	0.014	0.12
Genotype	1	23	5.43	0.029	0.19	1	28	0.21	0.652	0.01
Stimulus Length	3	69	23	0	0.5	3	84	18.17	0	0.39
Genotype*Block	4	92	1.83	0.137	0.07	4	112	1.29	0.283	0.04
Genotype*Stimulus Length	3	69	0.87	0.434	0.04	3	84	0.86	0.448	0.03
Stimulus Length*Block	12	276	1.35	0.231	0.06	12	336	0.88	0.527	0.03
Genotype*Stimulus Length*Block	12	276	0.84	0.552	0.04	12	336	0.82	0.579	0.03
10 Months
Female
Block	4	120	0.78	0.528	0.03	4	124	1.72	0.163	0.05
Genotype	1	30	5.26	0.029	0.15	1	31	2.37	0.133	0.07
Stimulus Length	3	90	28.77	0	0.49	3	93	24.98	0	0.45
Genotype*Block	4	120	0.95	0.43	0.03	4	124	1.69	0.168	0.05
Genotype*Stimulus Length	3	90	0.07	0.956	0	3	93	1.66	0.189	0.05
Stimulus Length*Block	12	360	1.38	0.202	0.04	12	372	0.74	0.651	0.02
Genotype*Stimulus Length*Block	12	360	0.64	0.748	0.02	12	372	1.28	0.258	0.04
Male
Block	4	92	3.8	0.01	0.14	4	112	2.48	0.069	0.08
Genotype	1	23	3.23	0.085	0.12	1	28	6.36	0.018	0.19
Stimulus Length	3	69	48.13	0	0.68	3	84	20.91	0	0.43
Genotype*Block	4	92	1.12	0.35	0.05	4	112	0.62	0.602	0.02
Genotype*Stimulus Length	3	69	0.89	0.424	0.04	3	84	1.38	0.258	0.05
Stimulus Length*Block	12	276	1.79	0.099	0.07	12	336	0.95	0.474	0.03
Genotype*Stimulus Length*Block	12	276	0.95	0.462	0.04	12	336	0.33	0.945	0.01

## Sheet: Tab 3 - APP PS1
	Column Labels
	APP-PS1
	% Correct					% Omission
Analysis	df1	df2	F	p	partial eta^2	df1	df2	F	p	partial eta^2
4 Months
Female
Block	4	128	0.13	0.956	0	4	128	0.22	0.907	0.01
Genotype	1	32	2.24	0.144	0.07	1	32	2.13	0.154	0.06
Stimulus Length	3	96	13.76	0	0.3	3	96	24.66	0	0.44
Genotype*Block	4	128	1.02	0.394	0.03	4	128	0.42	0.764	0.01
Genotype*Stimulus Length	3	96	0.34	0.731	0.01	3	96	2.1	0.11	0.06
Stimulus Length*Block	12	384	0.86	0.551	0.03	12	384	0.71	0.691	0.02
Genotype*Stimulus Length*Block	12	384	0.92	0.497	0.03	12	384	0.81	0.601	0.02
Male
Block	4	172	1.28	0.283	0.03	4	172	7.31	0.001	0.15
Genotype	1	43	0.39	0.536	0.01	1	43	0	0.977	0
Stimulus Length	3	129	27.5	0	0.39	3	129	45.21	0	0.51
Genotype*Block	4	172	1.25	0.293	0.03	4	172	2.72	0.065	0.06
Genotype*Stimulus Length	3	129	0.4	0.734	0.01	3	129	1.63	0.196	0.04
Stimulus Length*Block	12	516	0.85	0.563	0.02	12	516	1.14	0.335	0.03
Genotype*Stimulus Length*Block	12	516	1	0.436	0.02	12	516	0.93	0.498	0.02
7 Months
Female
Block	4	128	0.19	0.912	0.01	4	128	2.39	0.061	0.07
Genotype	1	32	1.94	0.173	0.06	1	32	8.16	0.007	0.2
Stimulus Length	3	96	11.52	0	0.26	3	96	18.35	0	0.36
Genotype*Block	4	128	1.77	0.155	0.05	4	128	0.88	0.469	0.03
Genotype*Stimulus Length	3	96	0.56	0.629	0.02	3	96	1.31	0.277	0.04
Stimulus Length*Block	12	384	0.51	0.842	0.02	12	384	0.63	0.753	0.02
Genotype*Stimulus Length*Block	12	384	0.77	0.623	0.02	12	384	1.03	0.416	0.03
Male
Block	4	172	1.85	0.124	0.04	4	172	5.45	0.001	0.11
Genotype	1	43	2.04	0.16	0.05	1	43	0.63	0.43	0.01
Stimulus Length	3	129	34.99	0	0.45	3	129	31.23	0	0.42
Genotype*Block	4	172	0.91	0.459	0.02	4	172	0.63	0.619	0.01
Genotype*Stimulus Length	3	129	2.05	0.114	0.05	3	129	0.48	0.676	0.01
Stimulus Length*Block	12	516	0.98	0.451	0.02	12	516	0.41	0.927	0.01
Genotype*Stimulus Length*Block	12	516	1.48	0.158	0.03	12	516	0.94	0.488	0.02
10 Months
Female
Block	4	128	1.13	0.343	0.03	4	128	1.26	0.292	0.04
Genotype	1	32	0	0.962	0	1	32	1.26	0.27	0.04
Stimulus Length	3	96	8.4	0	0.21	3	96	18.32	0	0.36
Genotype*Block	4	128	0.66	0.596	0.02	4	128	0.26	0.882	0.01
Genotype*Stimulus Length	3	96	0.02	0.994	0	3	96	0.5	0.666	0.02
Stimulus Length*Block	12	384	1.61	0.123	0.05	12	384	0.92	0.498	0.03
Genotype*Stimulus Length*Block	12	384	1.49	0.163	0.04	12	384	0.78	0.622	0.02
Male
Block	4	172	0.88	0.467	0.02	4	172	8.98	0	0.17
Genotype	1	43	0.74	0.394	0.02	1	43	2.21	0.145	0.05
Stimulus Length	3	129	11.66	0	0.21	3	129	34.25	0	0.44
Genotype*Block	4	172	1.48	0.216	0.03	4	172	0.26	0.868	0.01
Genotype*Stimulus Length	3	129	3.25	0.03	0.07	3	129	1.19	0.317	0.03
Stimulus Length*Block	12	516	1.19	0.304	0.03	12	516	1.06	0.39	0.02
Genotype*Stimulus Length*Block	12	516	0.75	0.661	0.02	12	516	1.18	0.307	0.03
